# Supplementary material for: Inter-individual methylation variability in differentially methylated regions between maternal whole blood and first trimester CVS
Source: PubMed Central journal article supplement (PMC4243368; doi:10.1186/s13039-014-0073-8), 2014-11-01

Initial screening on six WBF and six CVS for the selection of new DMRs

### CHR21(Nn2)

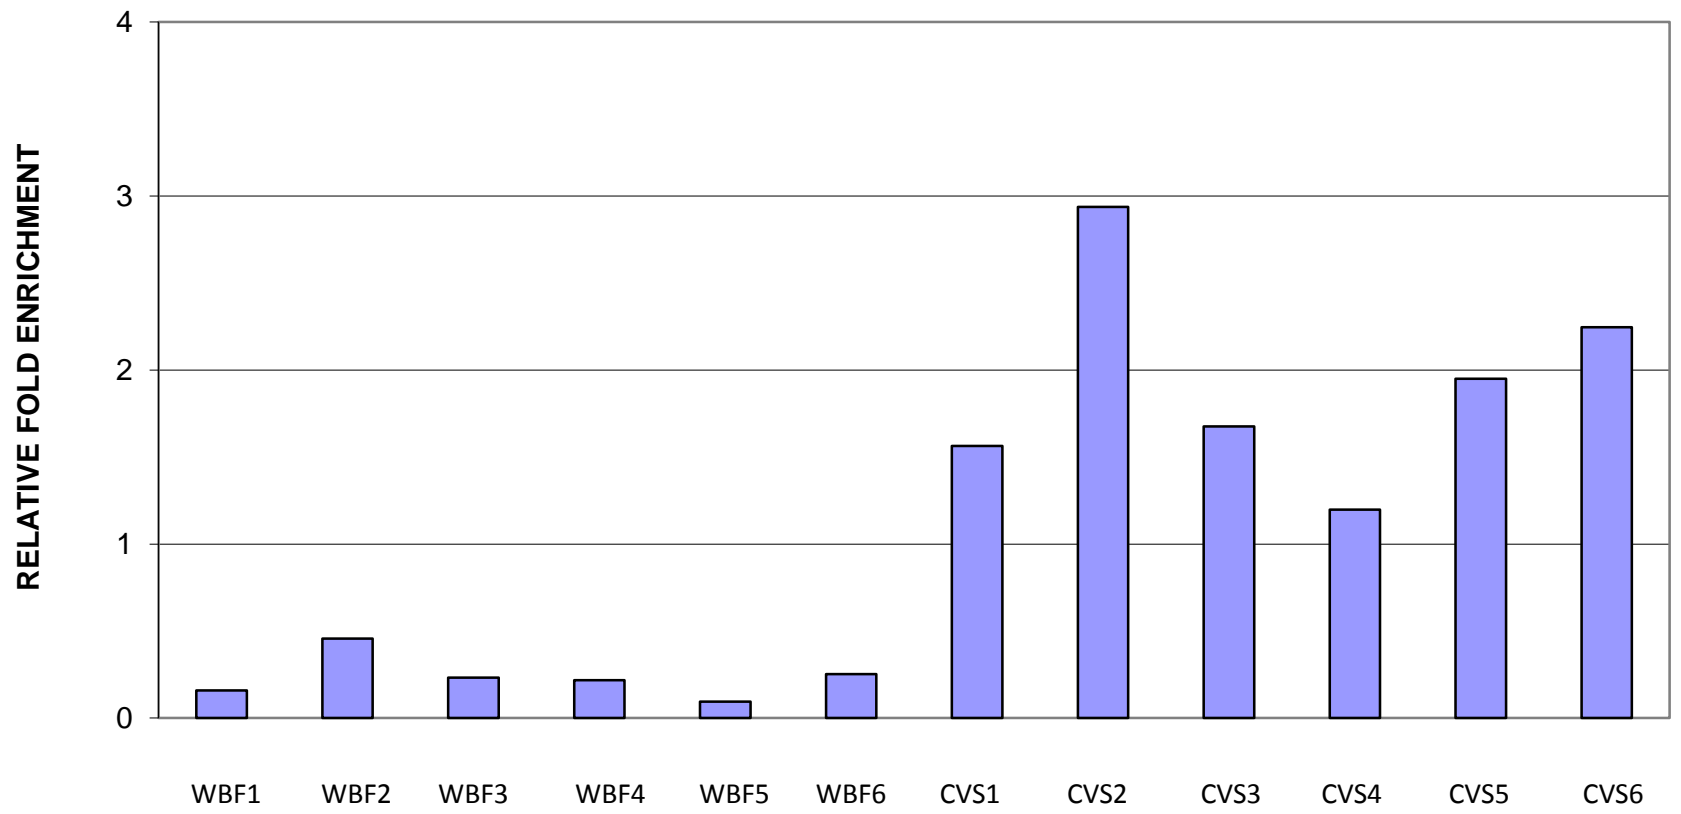

### CHR21(On2)

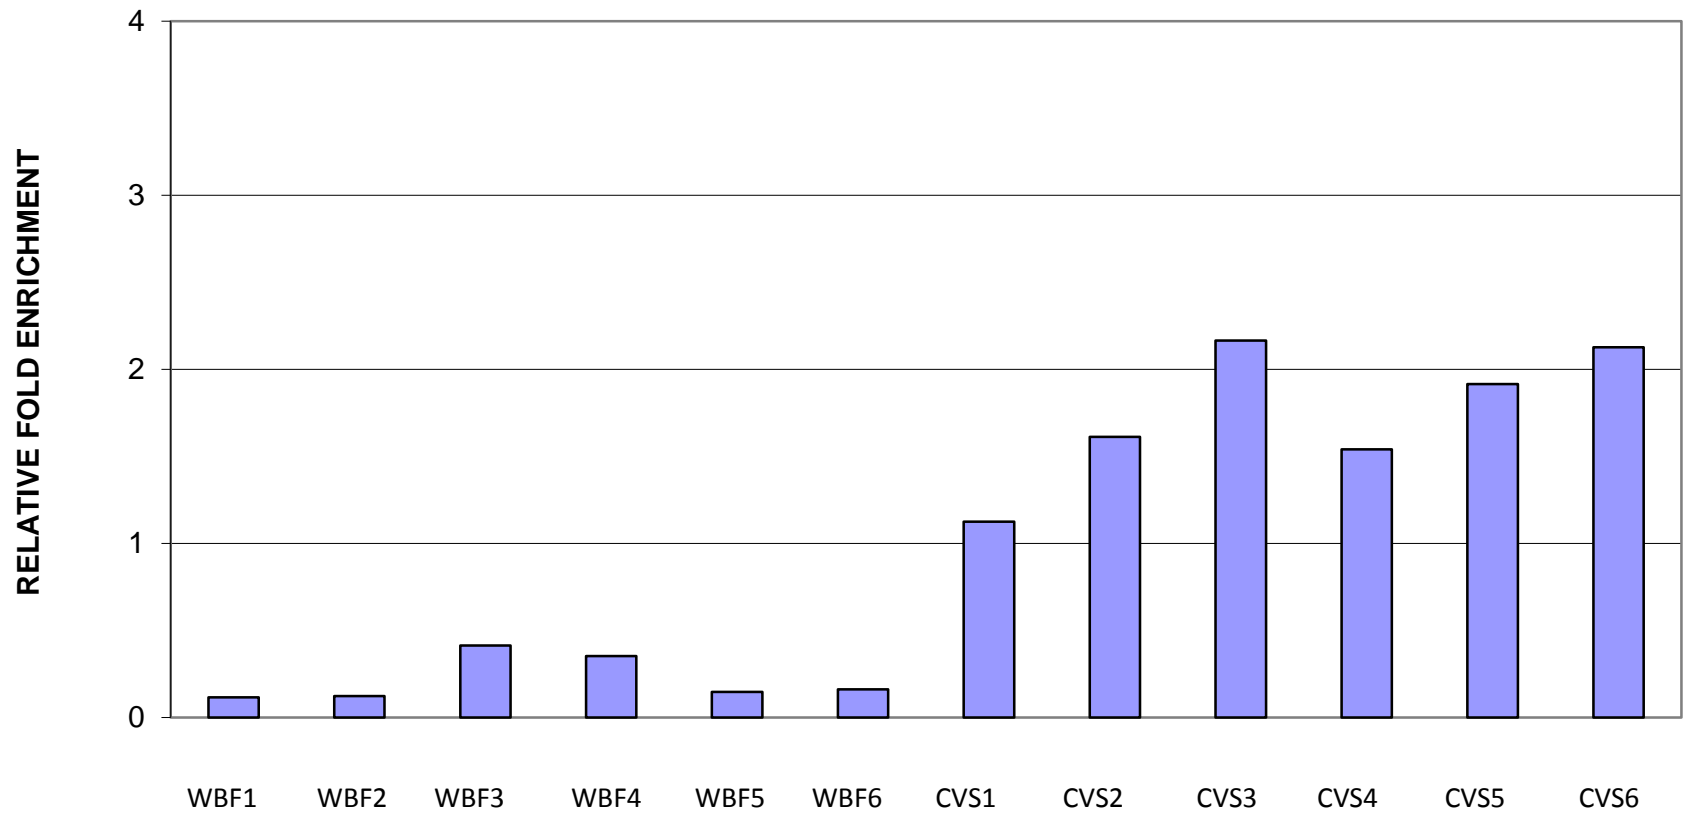

### CHR21(Fd1)

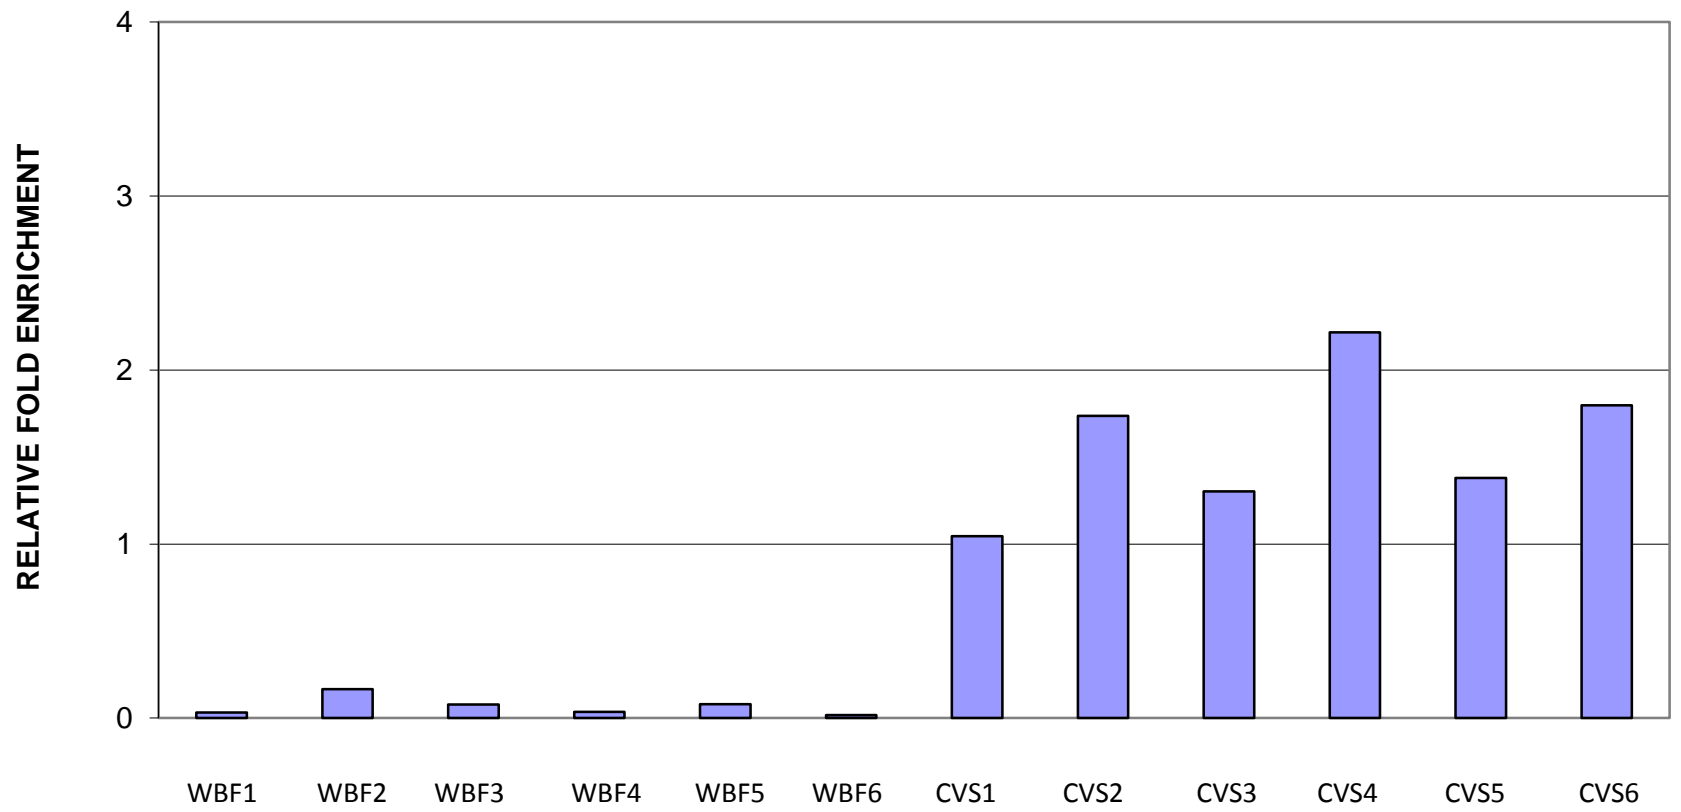

### CHR21(Id2)

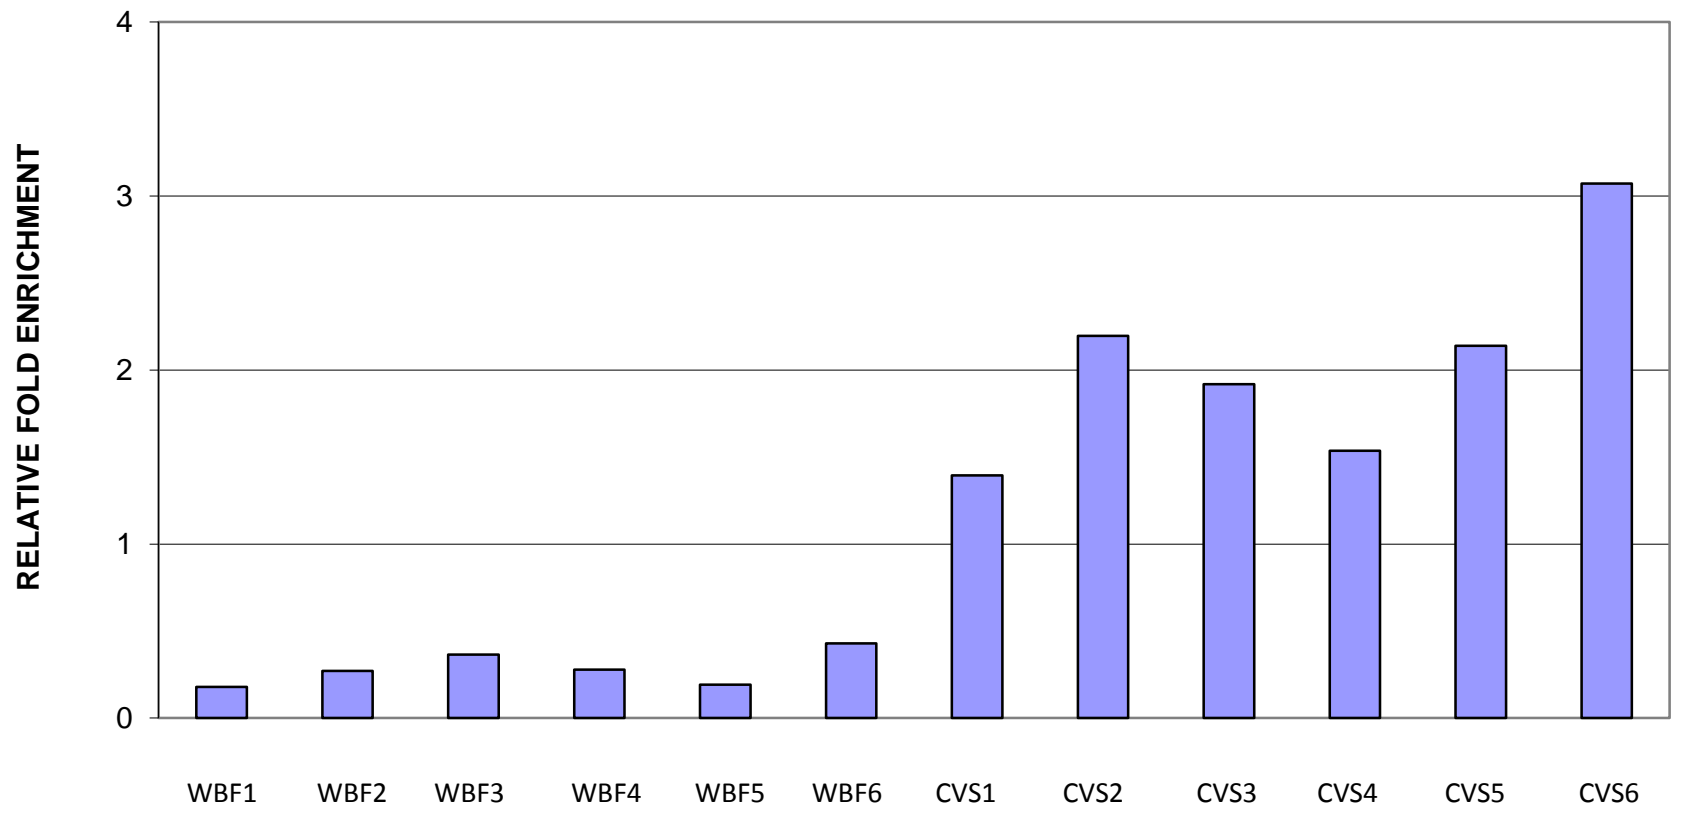

### CHR18(AII2)

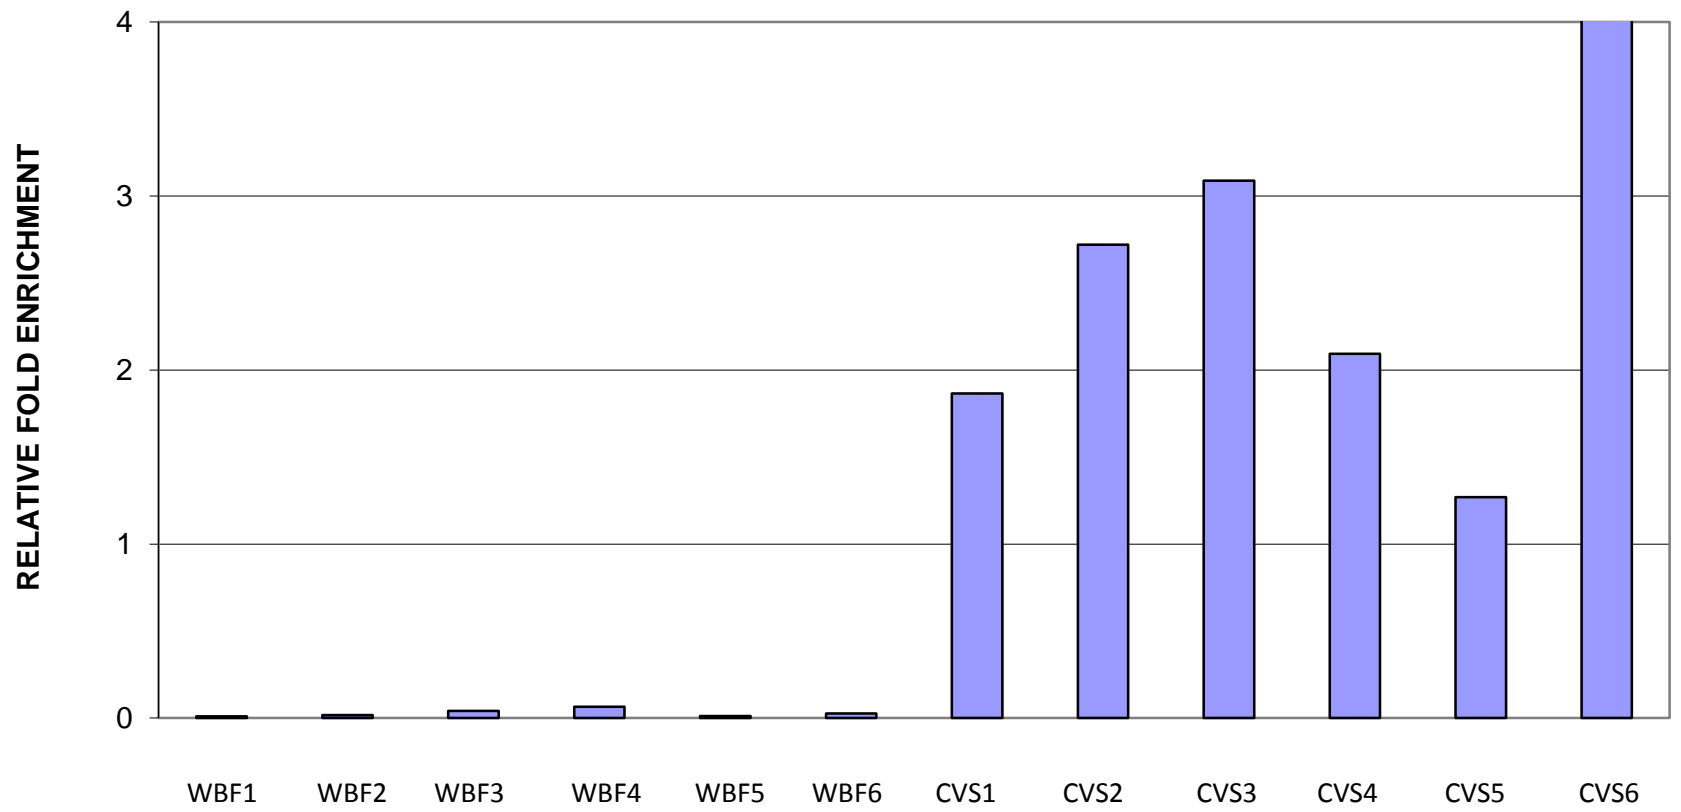

### CHR18(B3)

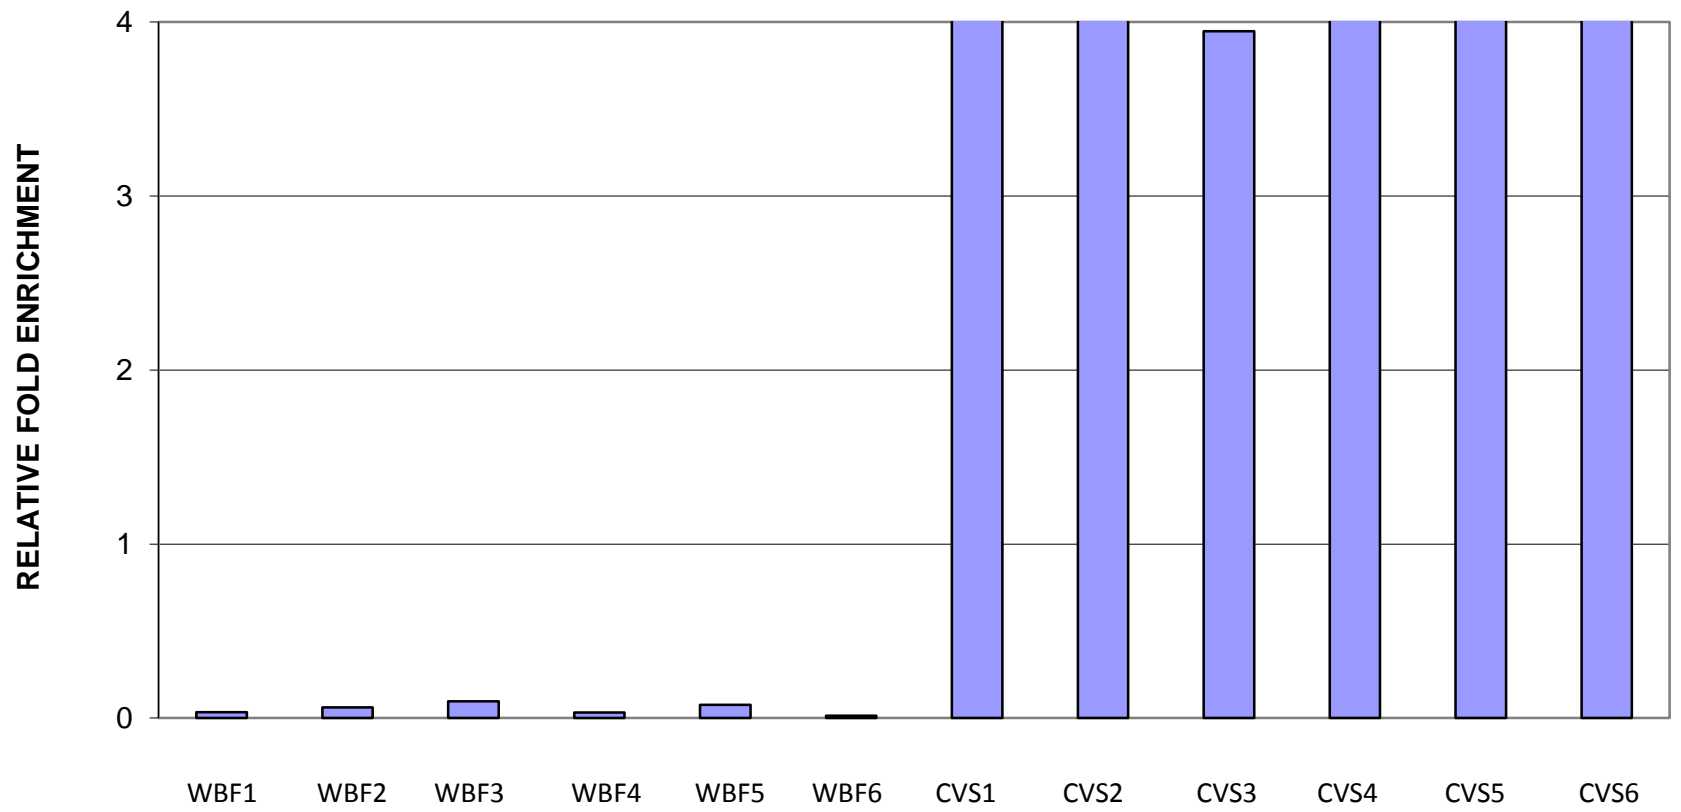

### CHR18(C1)

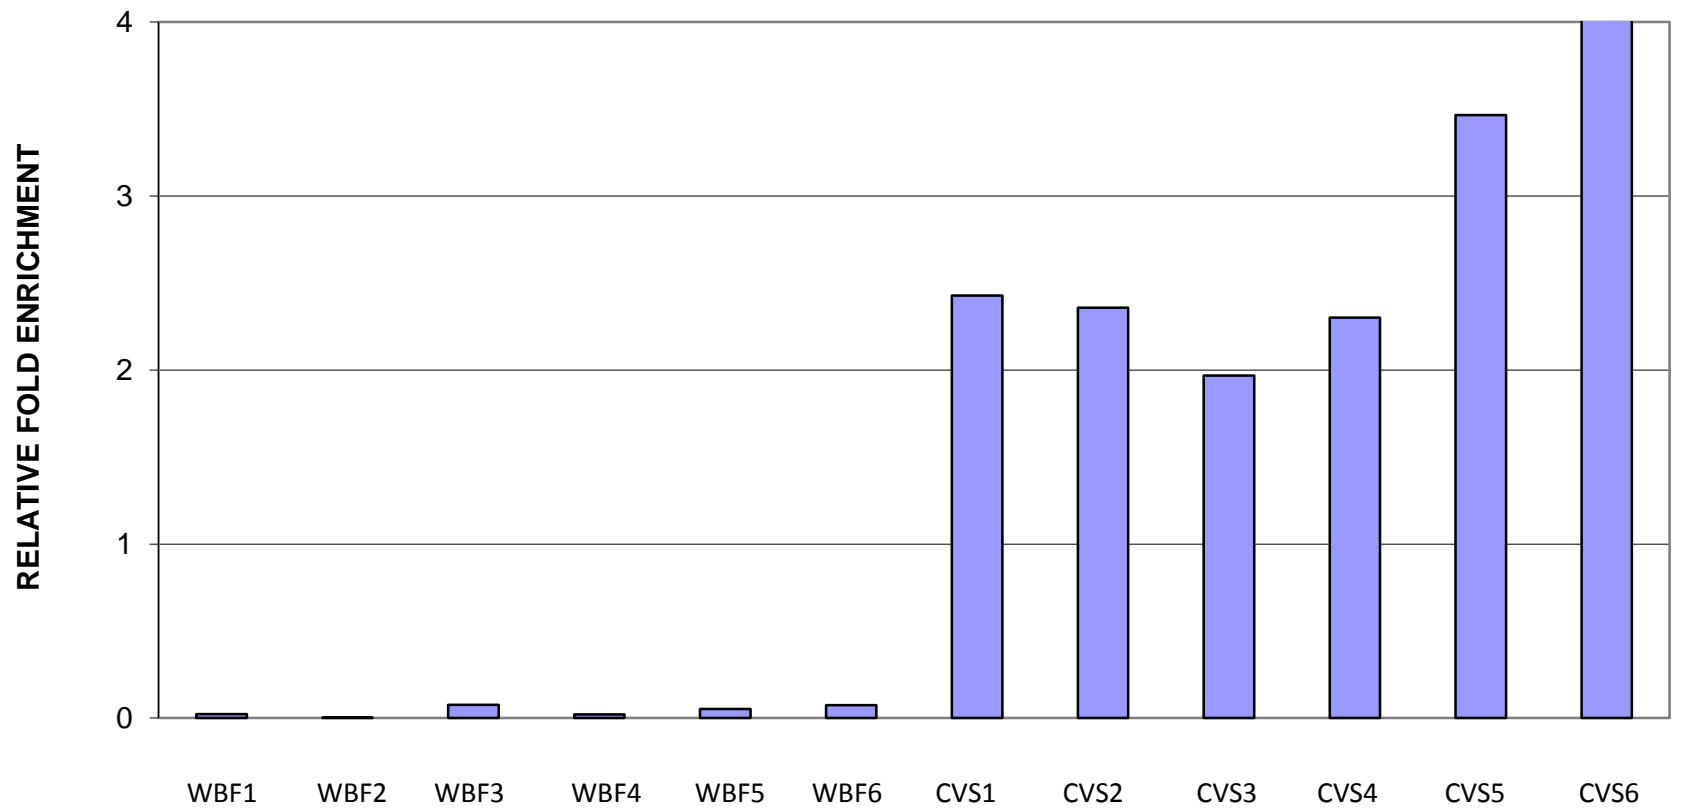



### CHR21(M1)

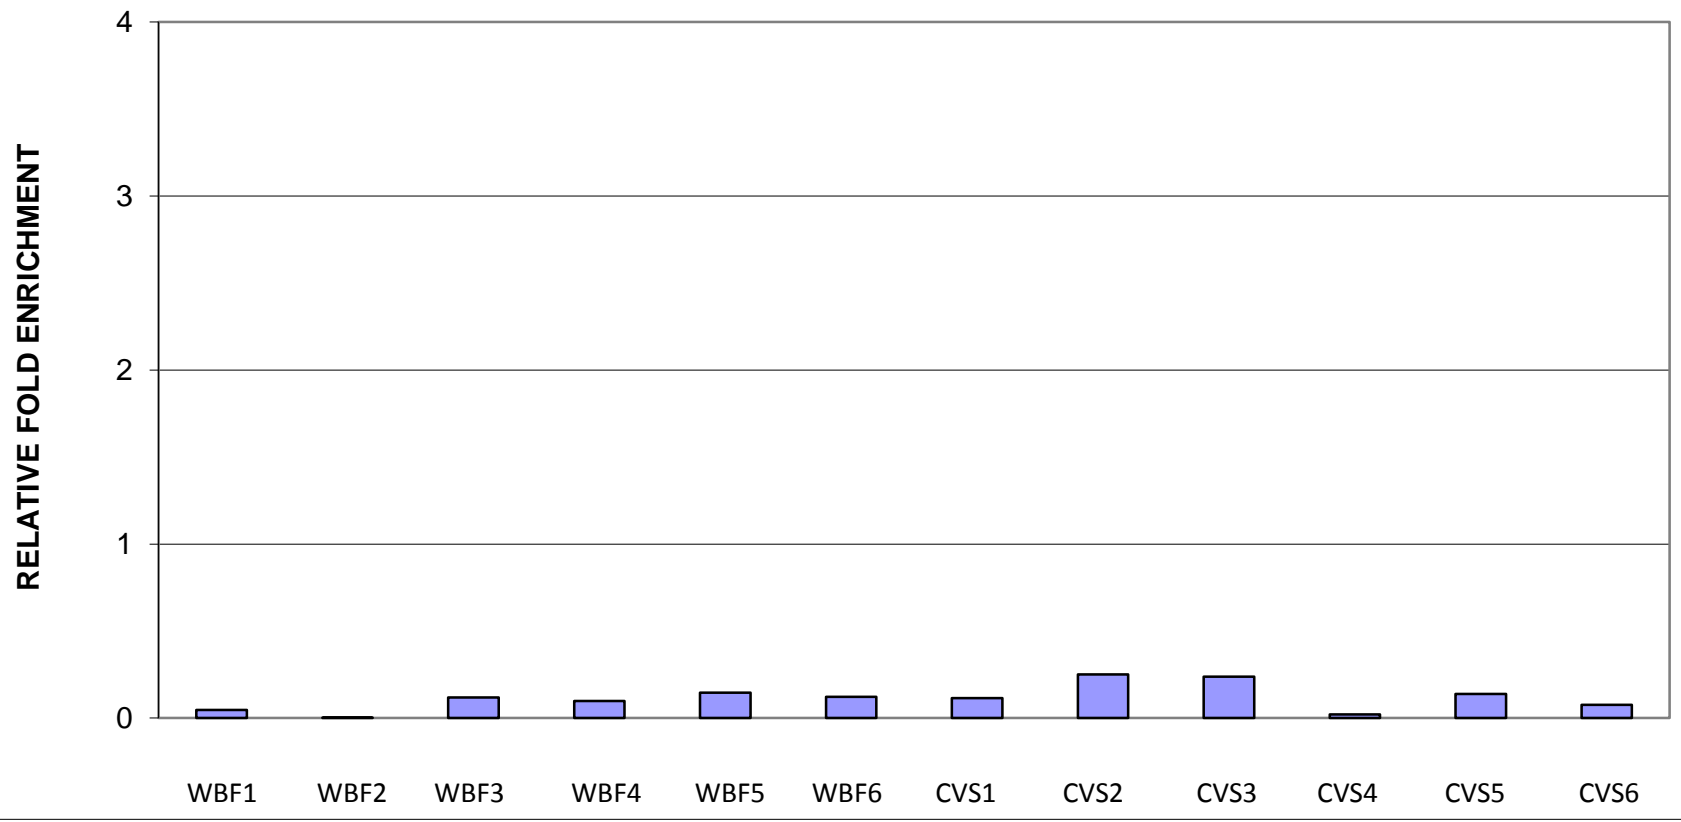

### CHR21(M1E)

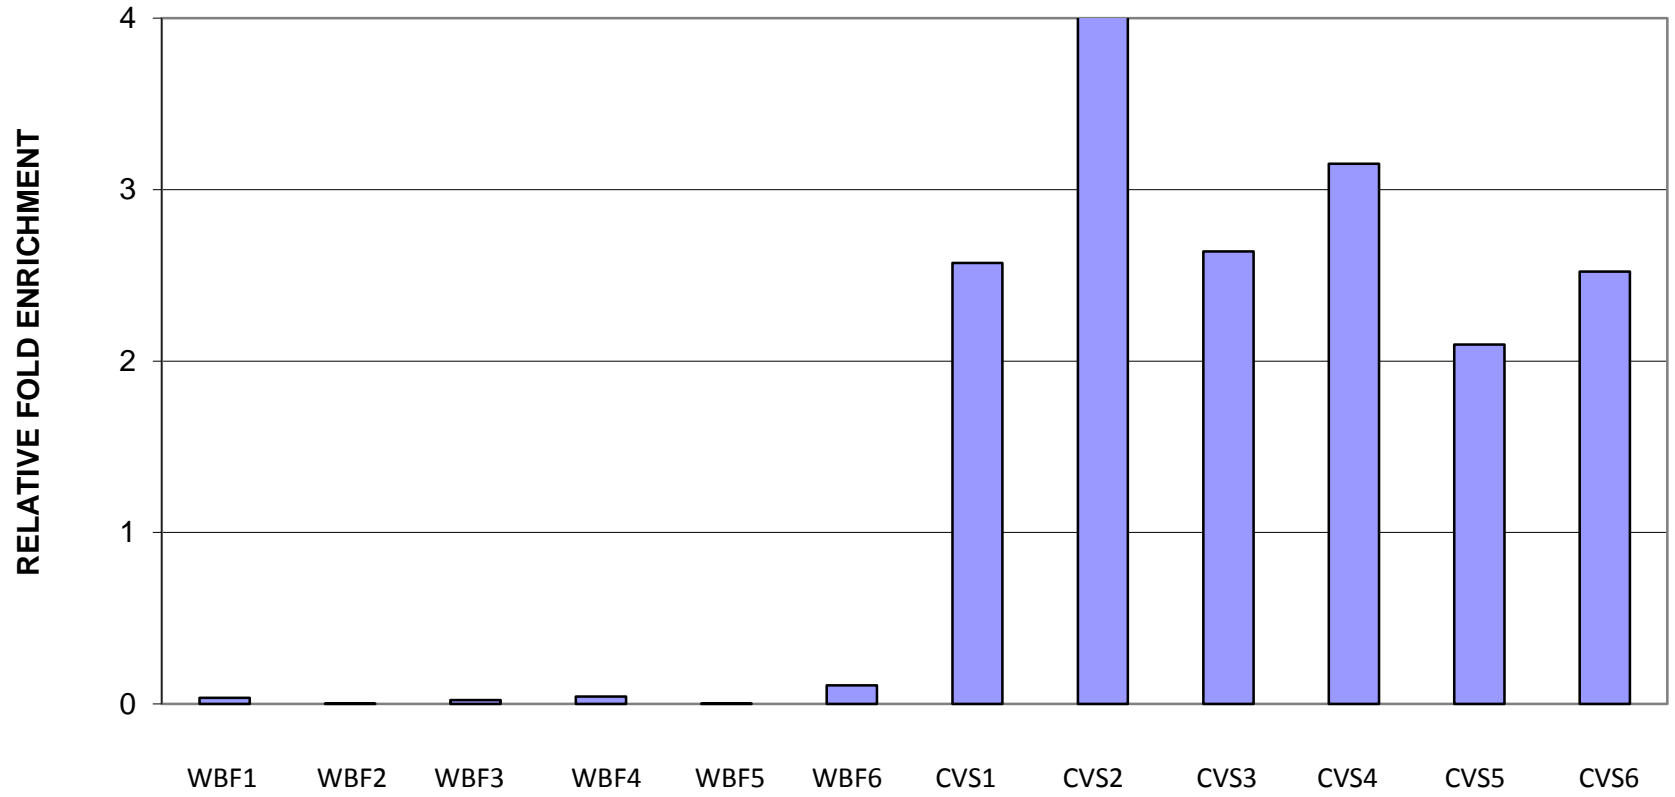

### CHR21(M2)

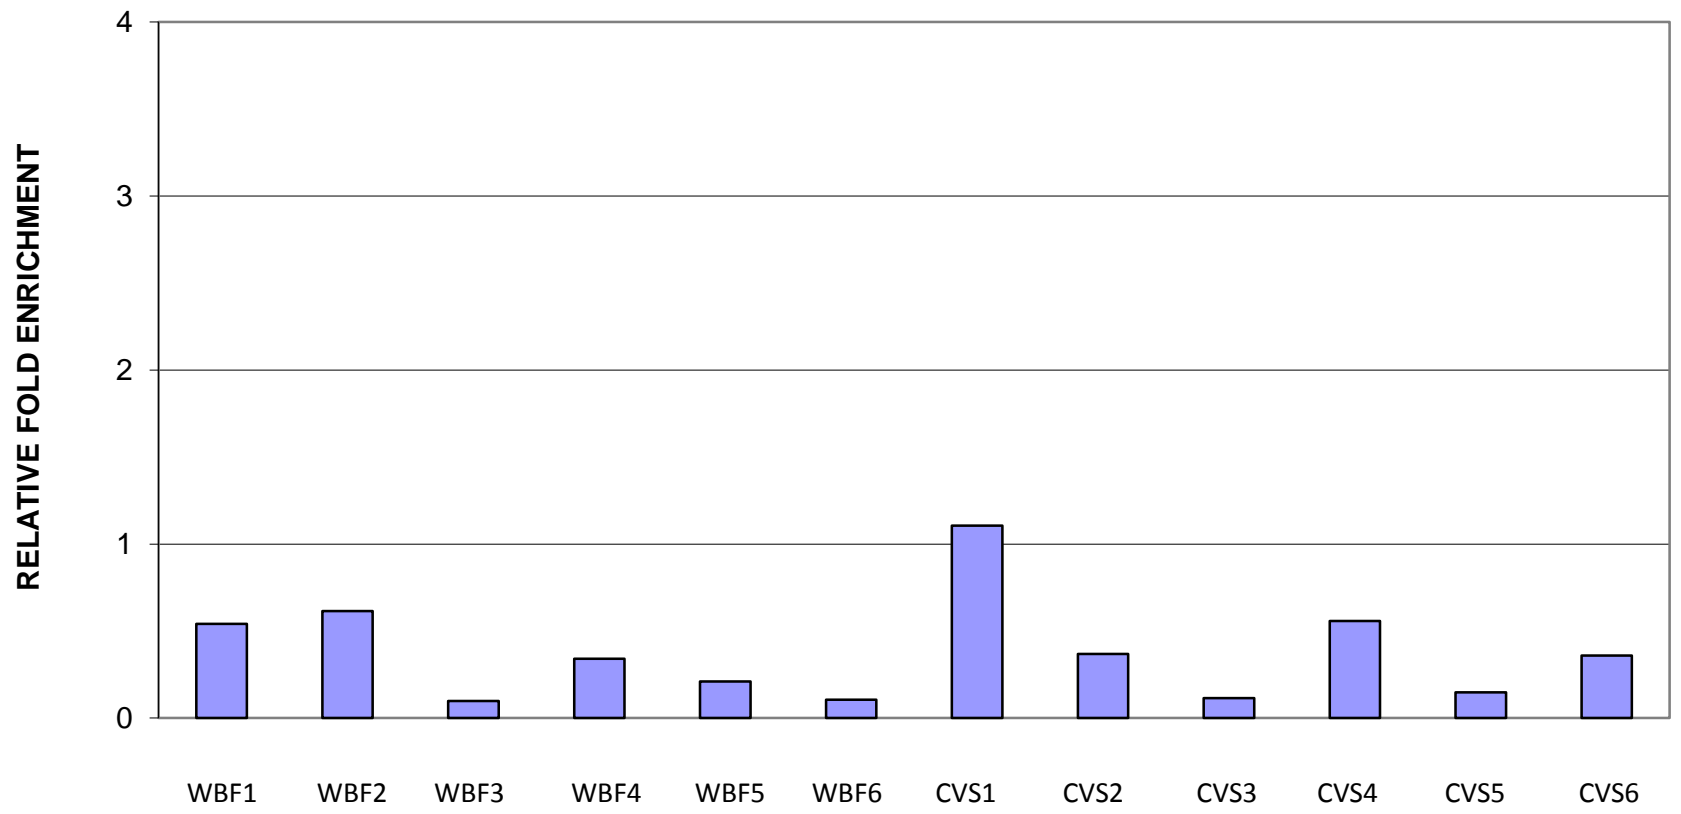

### CHR21(M3)

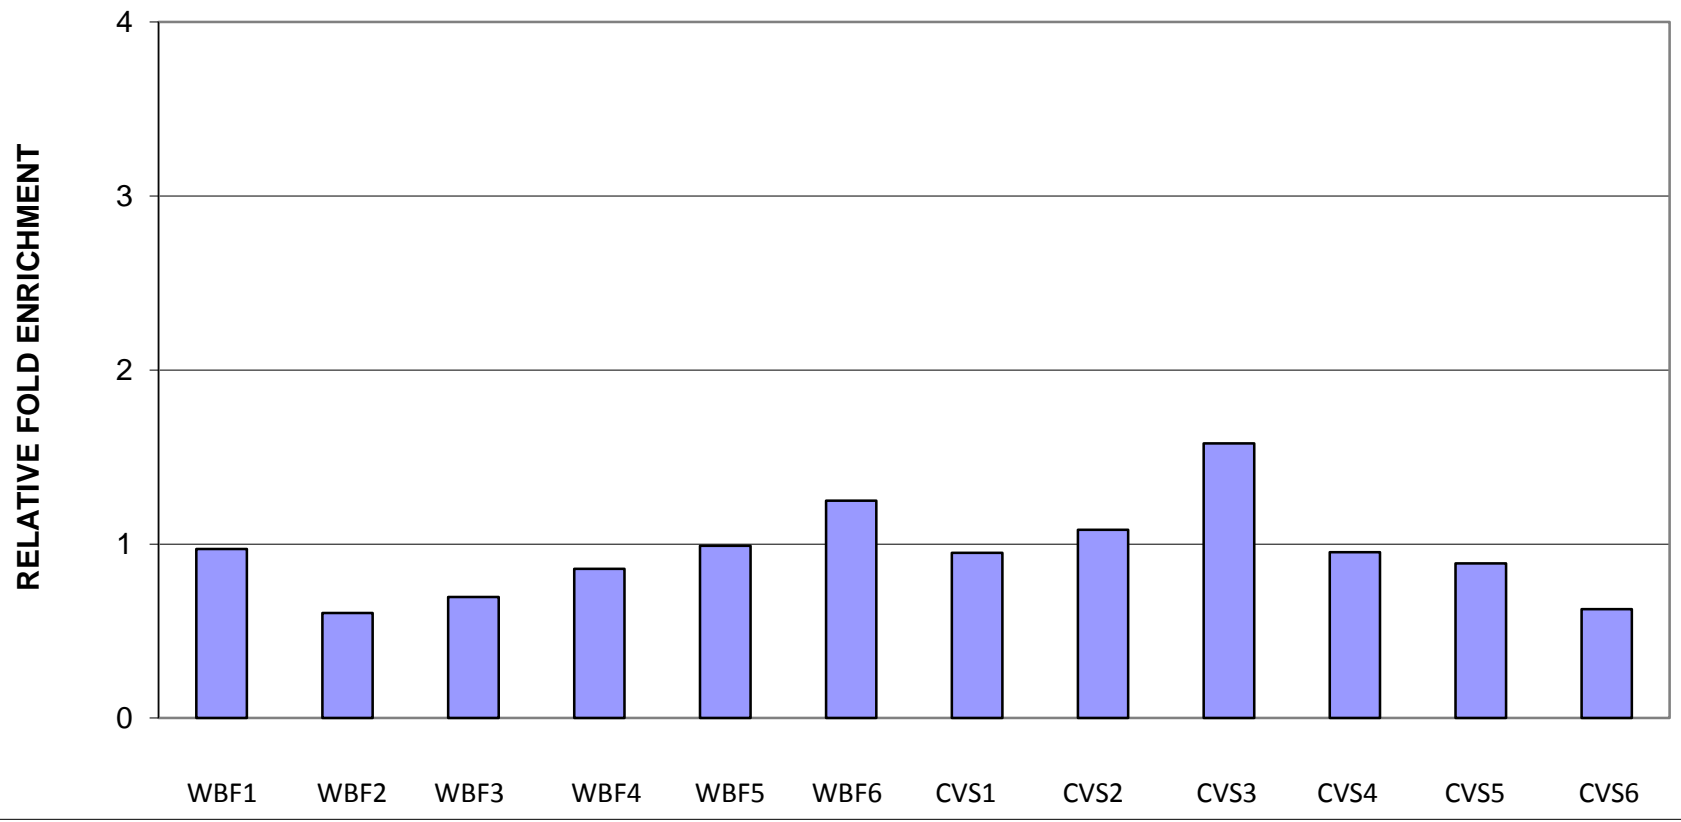

### CHR21(M4)

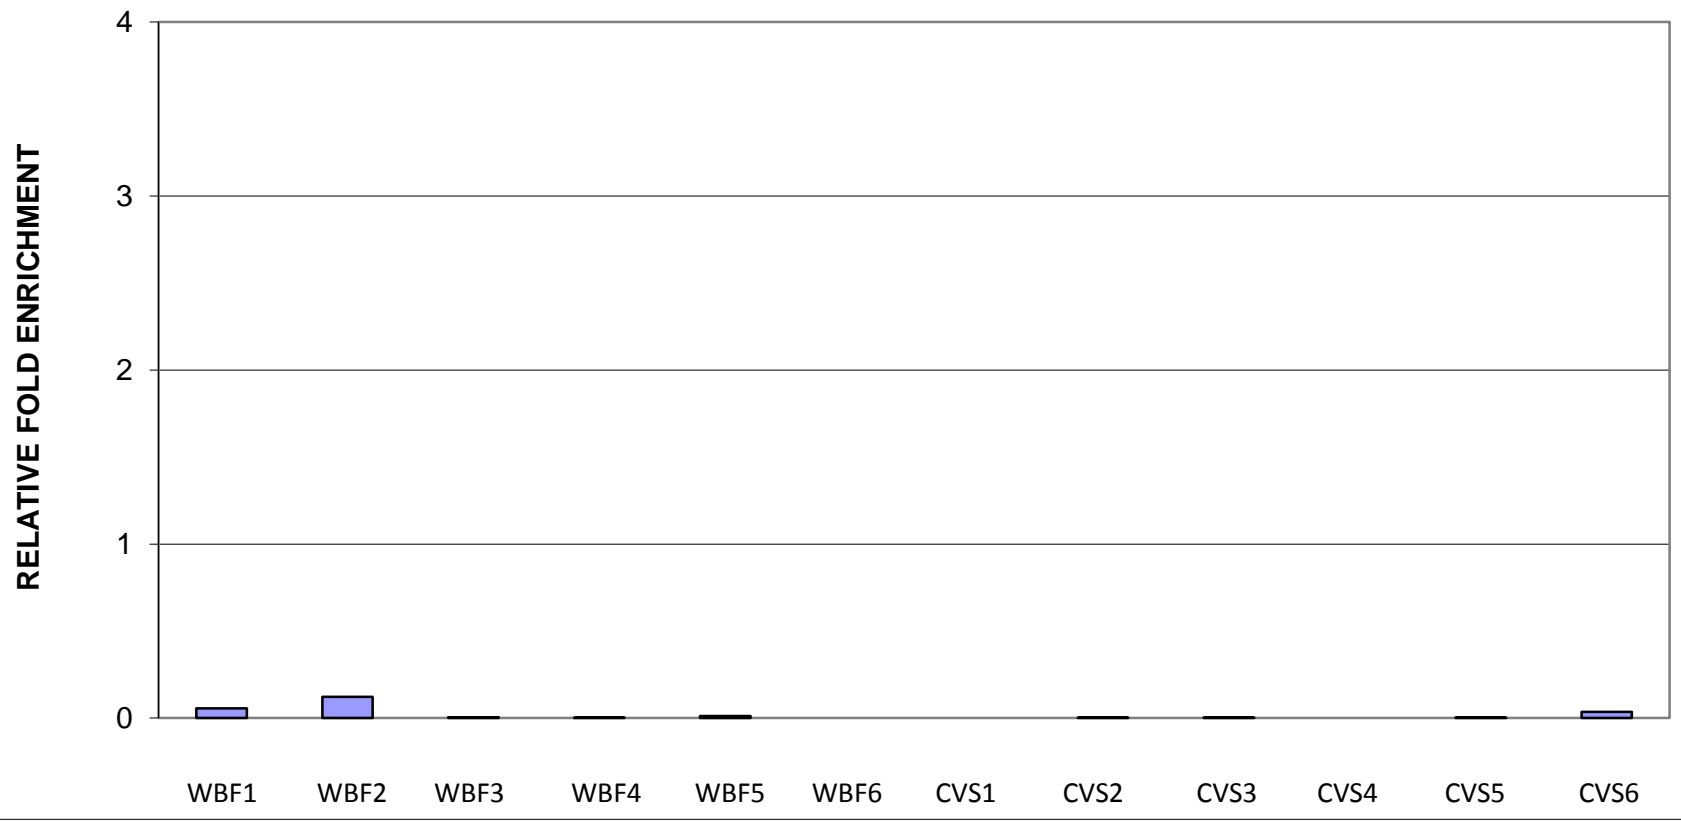

### CHR21(M5B)

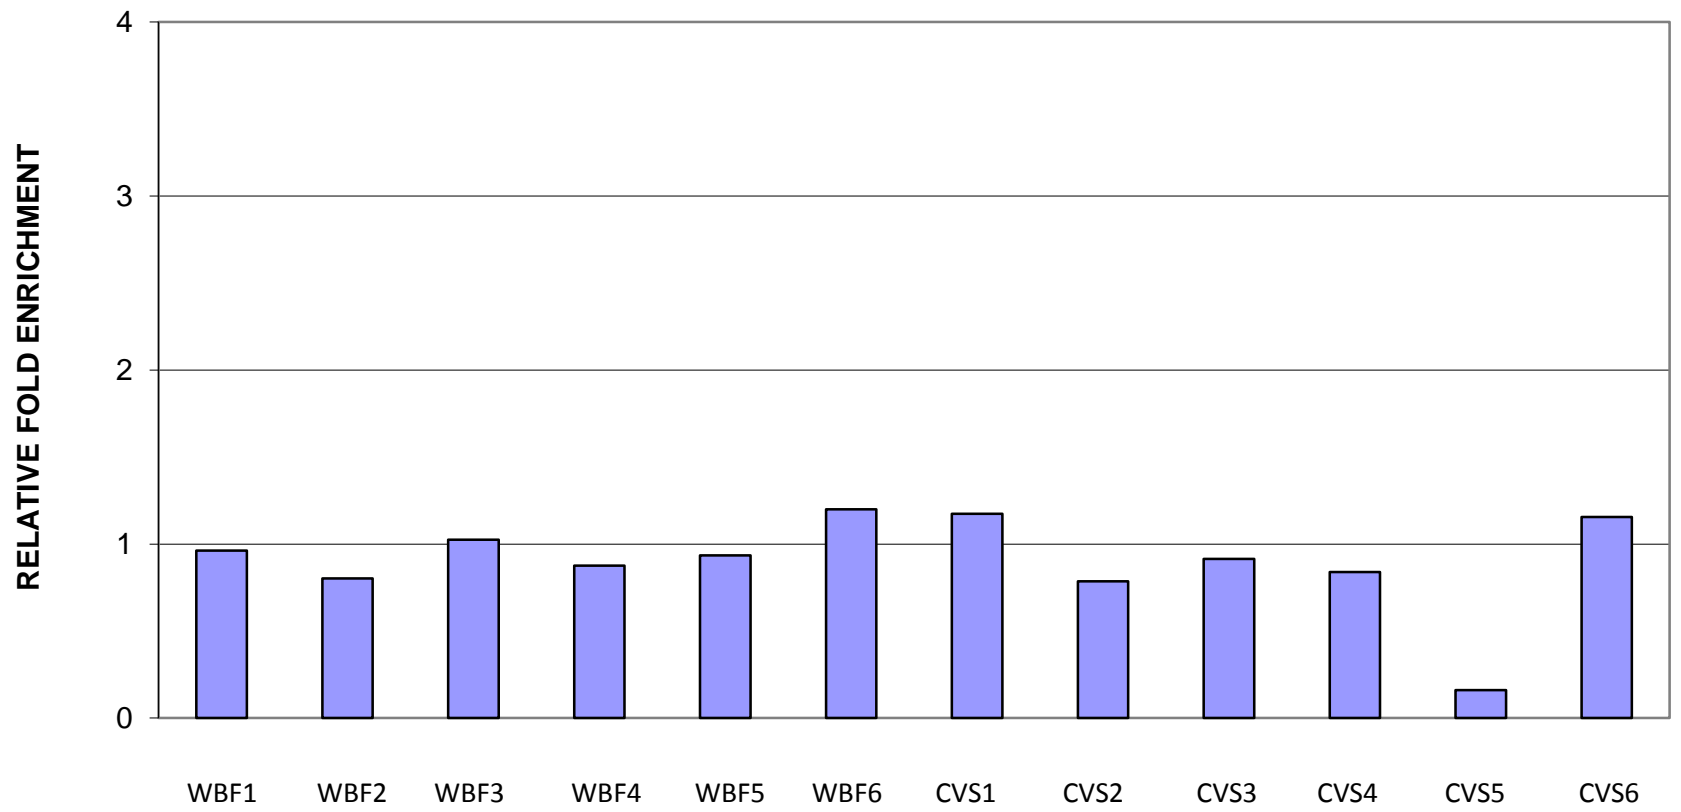

### CHR21(M6)

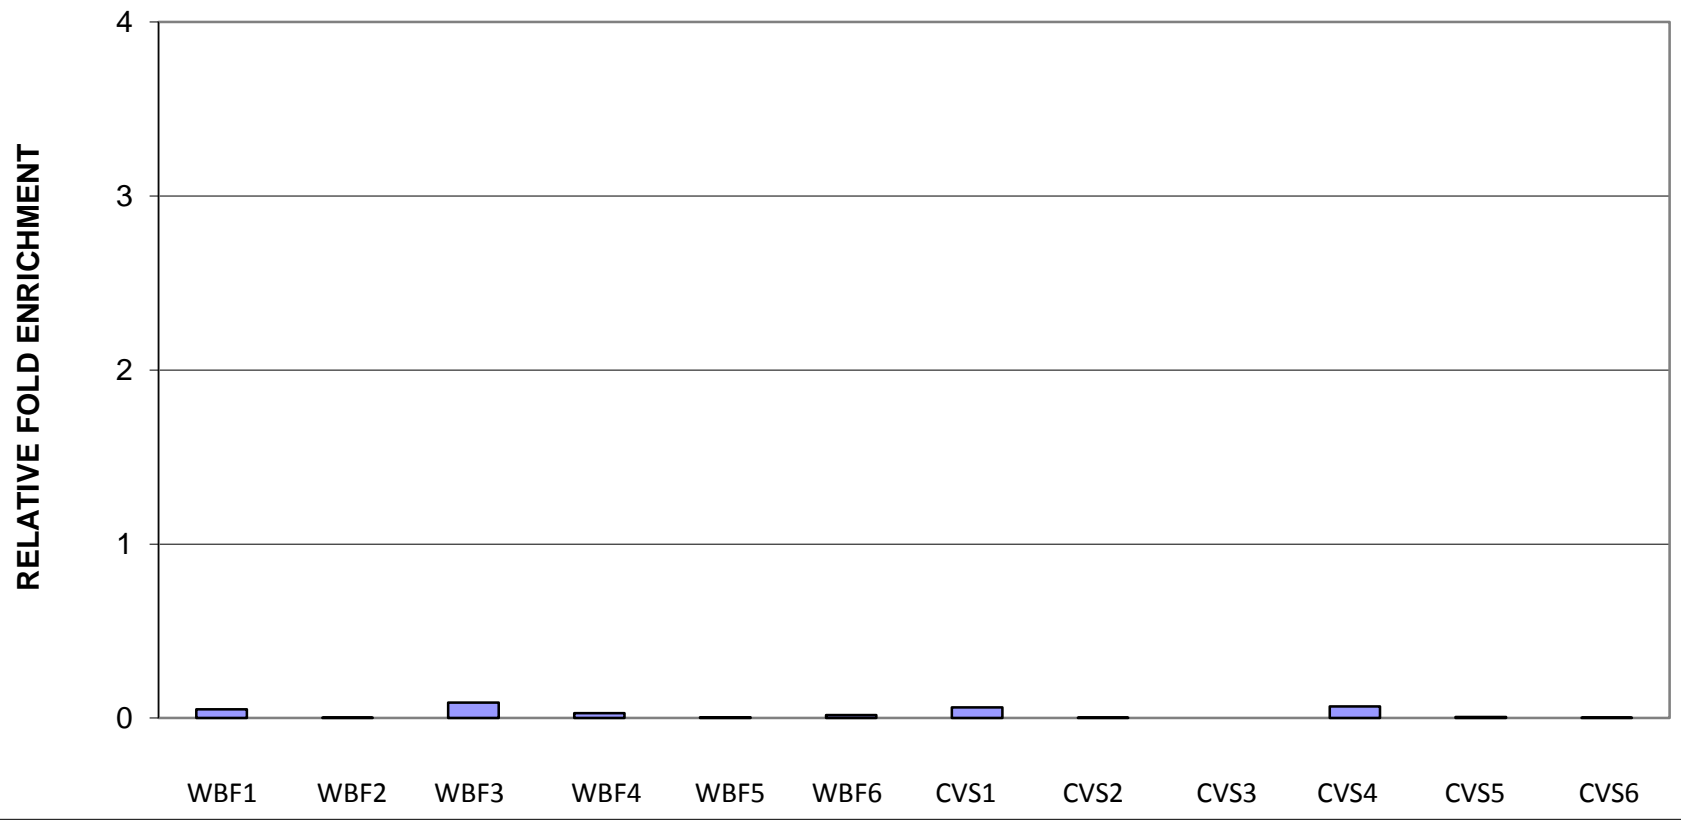

### CHR21(M7)

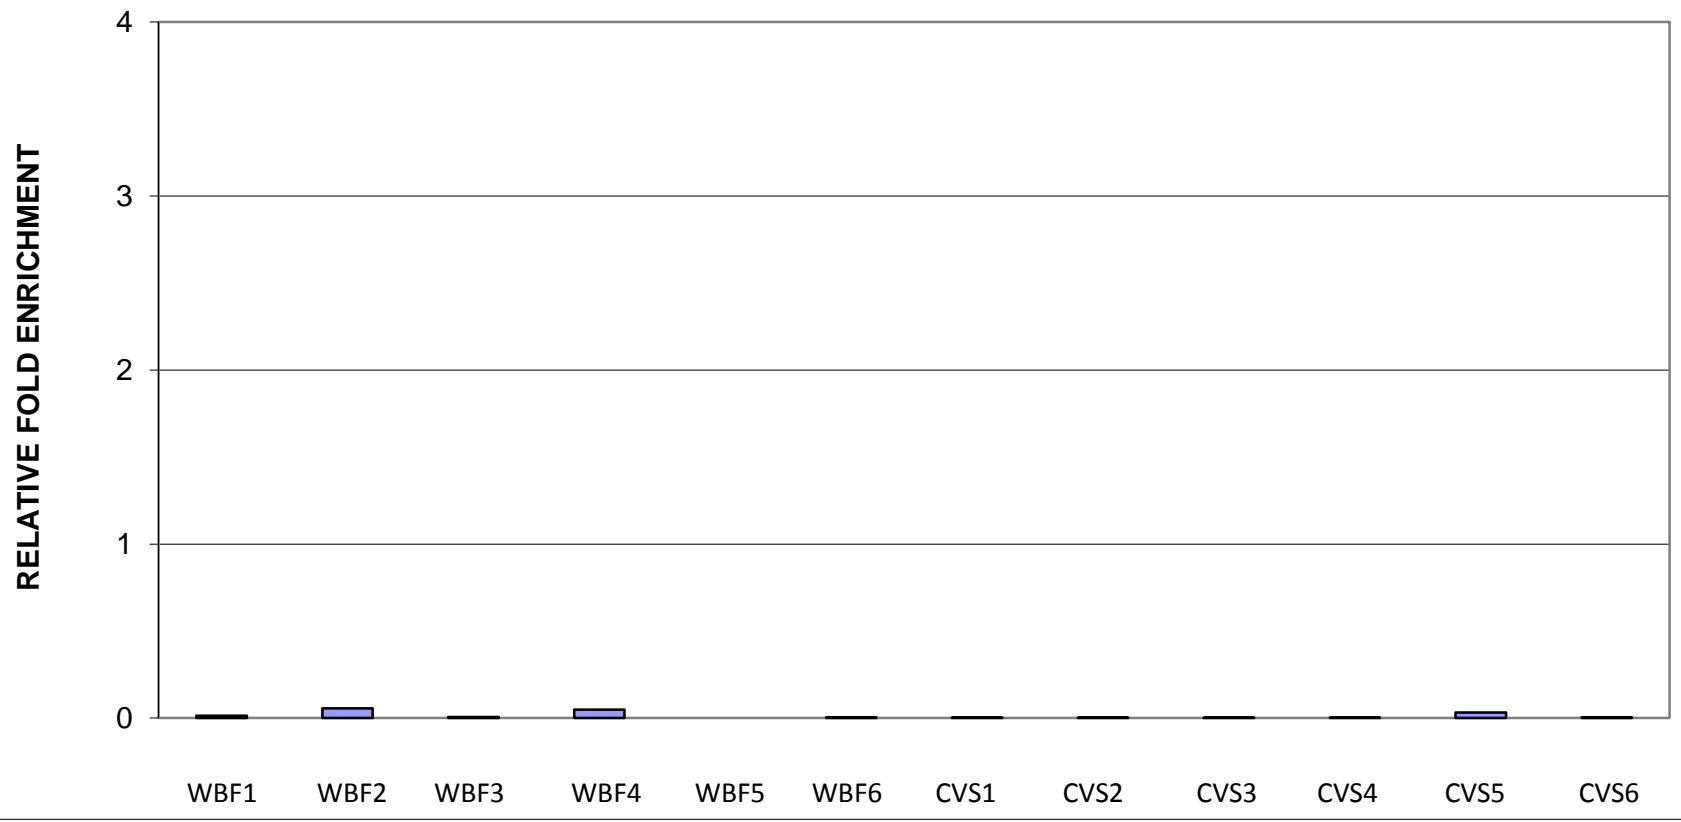



### CHR21(M8)

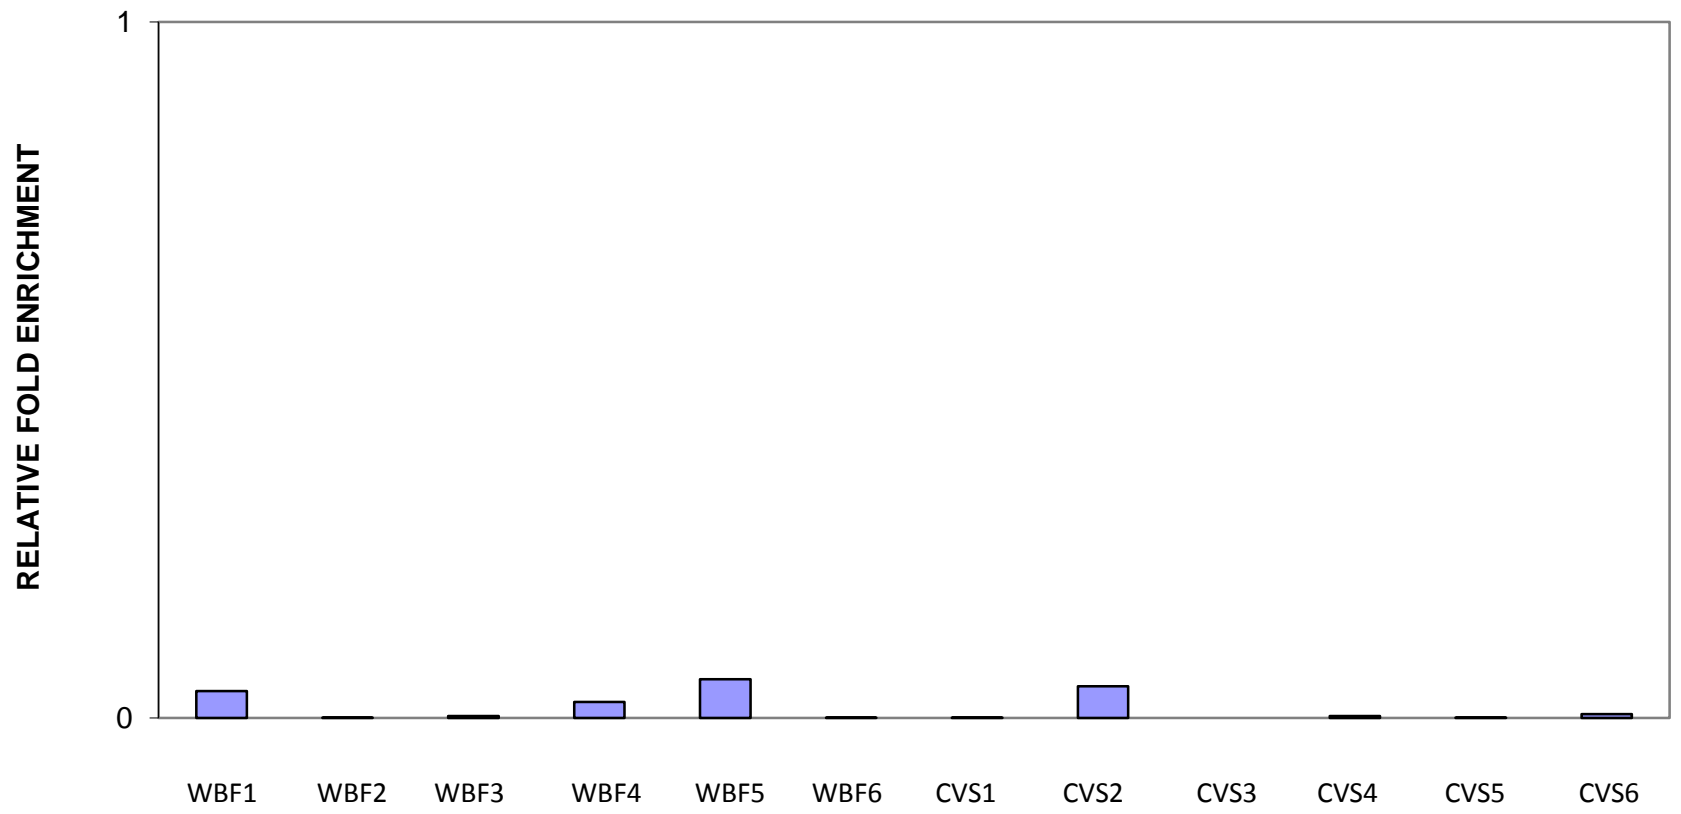

### CHR21(M9)

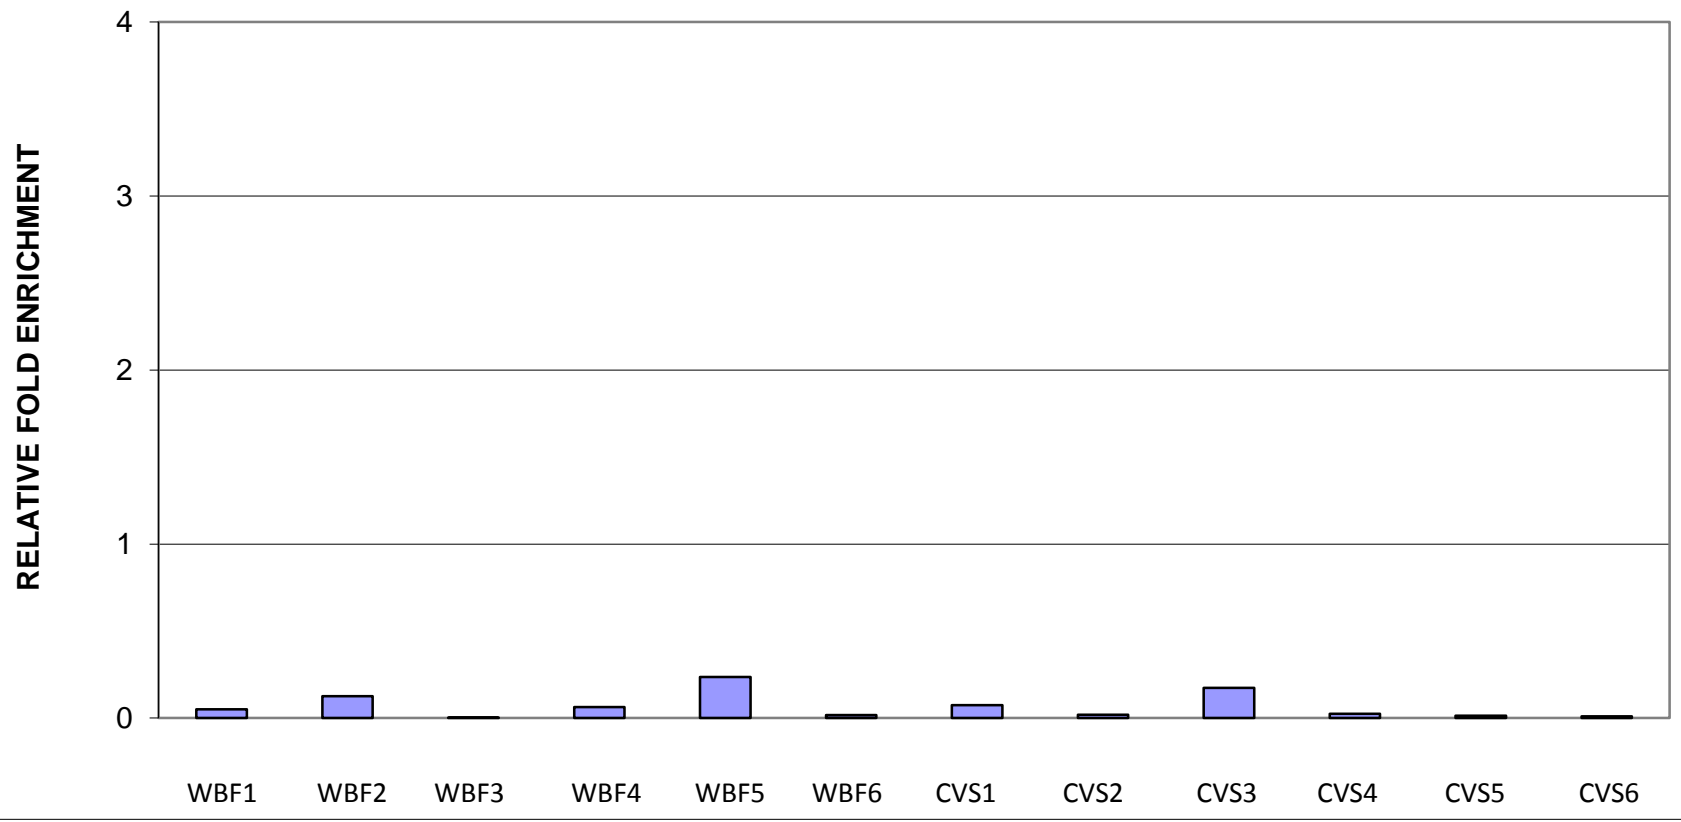

### CHR21(M10)

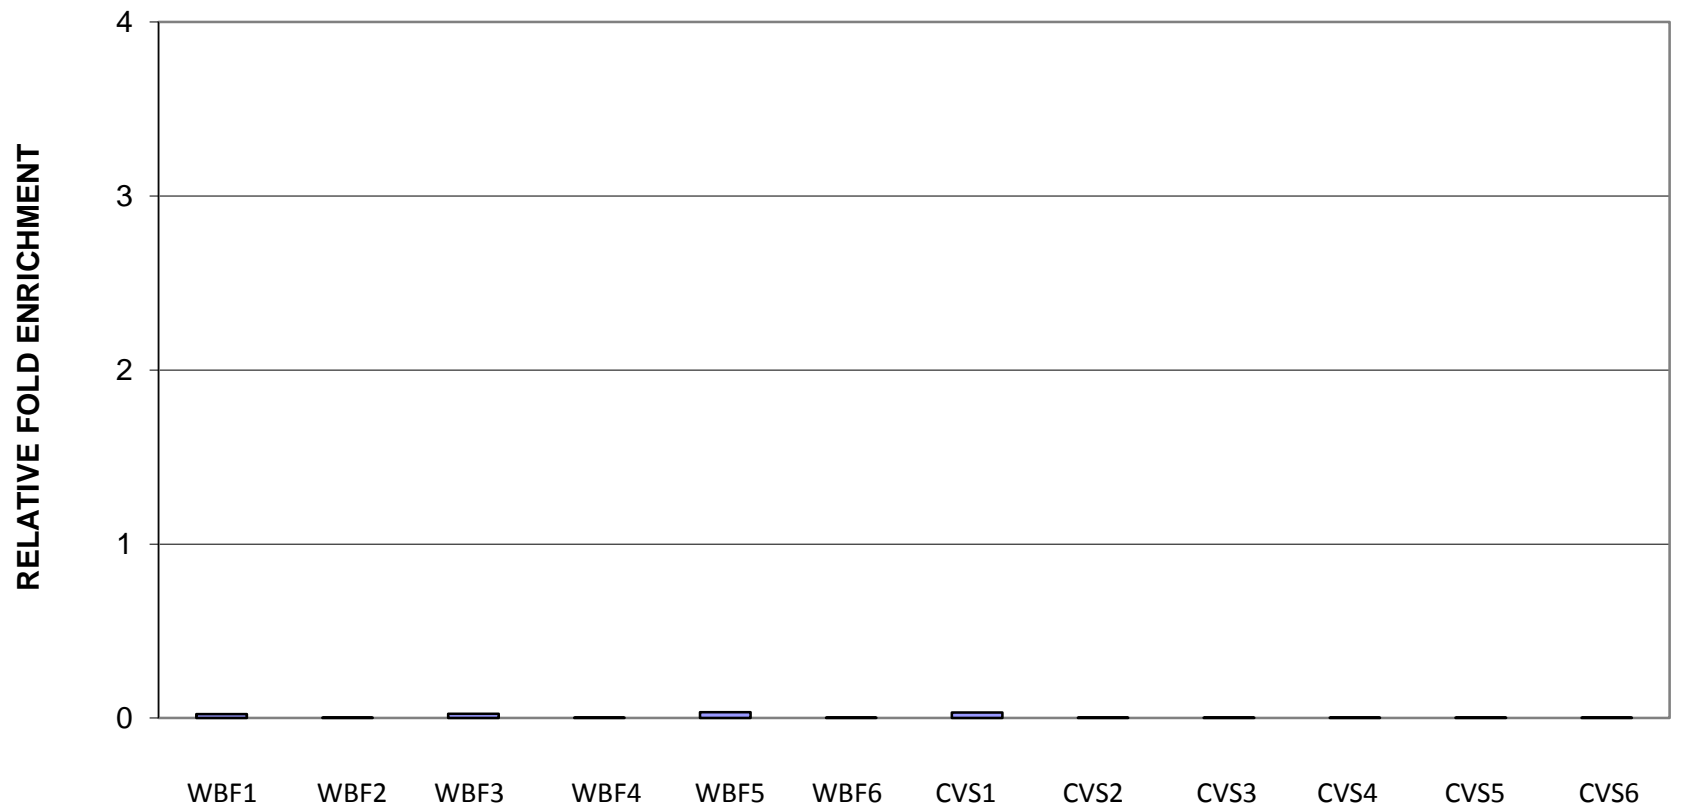

### CHR21(M11)

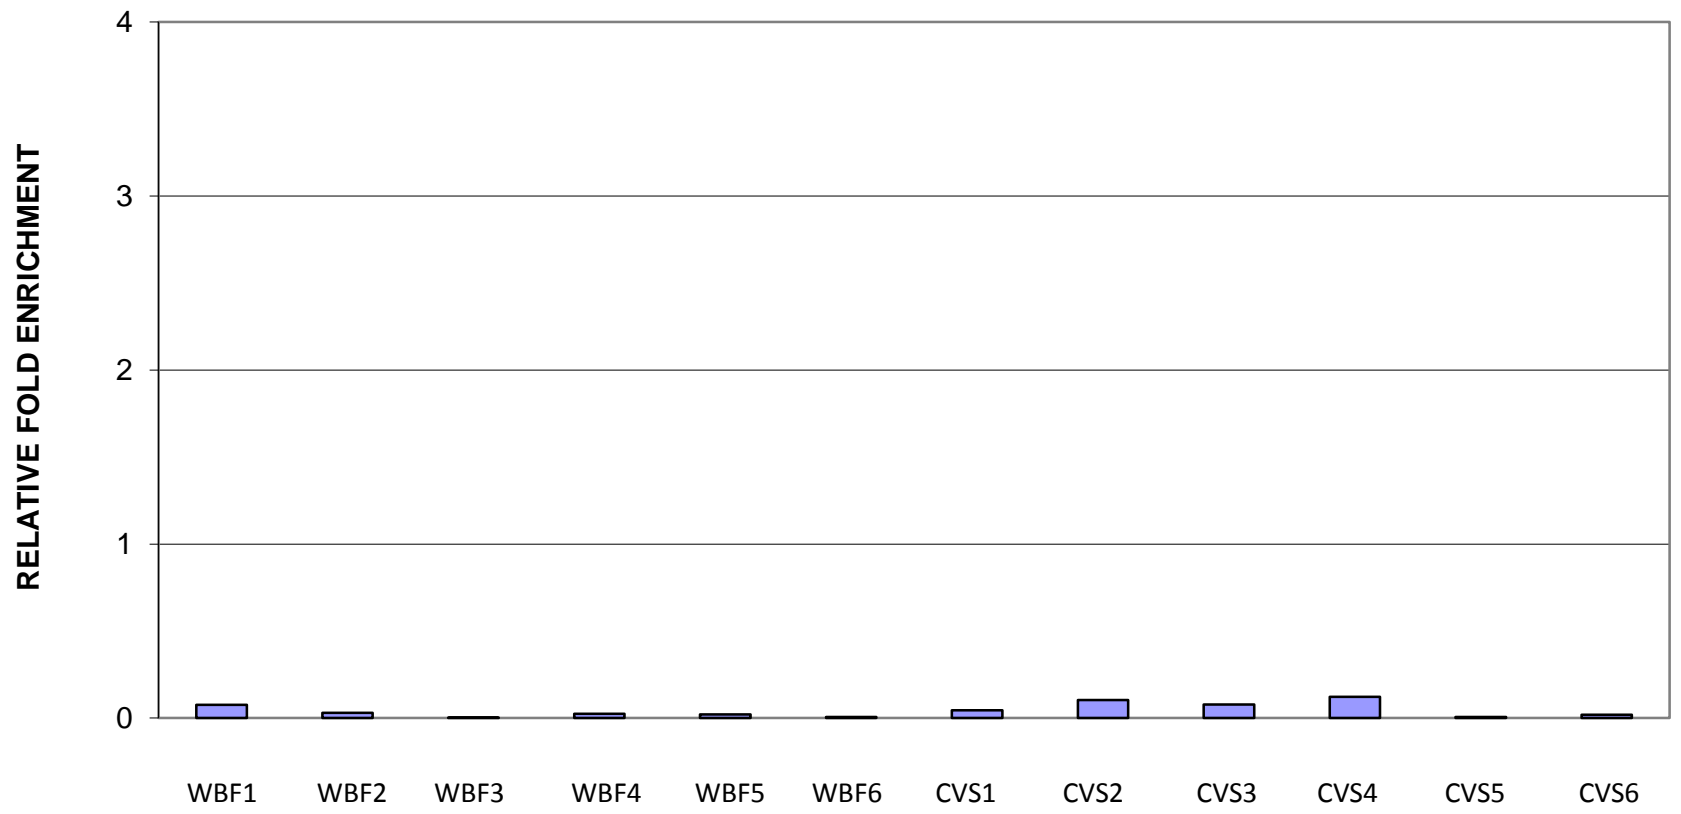

### CHR21(M12)

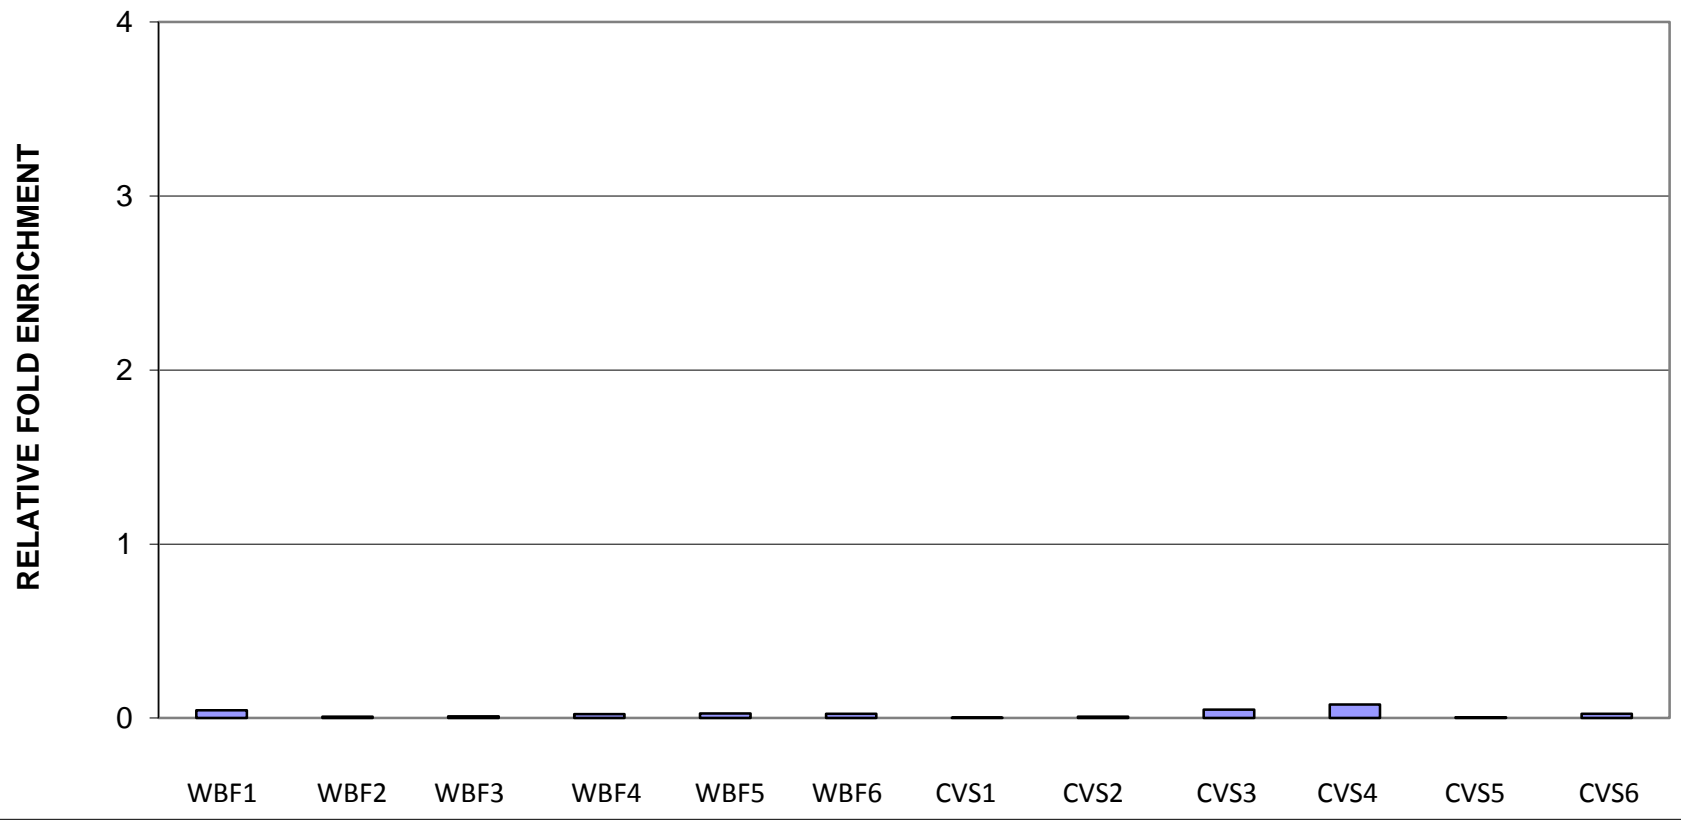

### CHR21(M13)

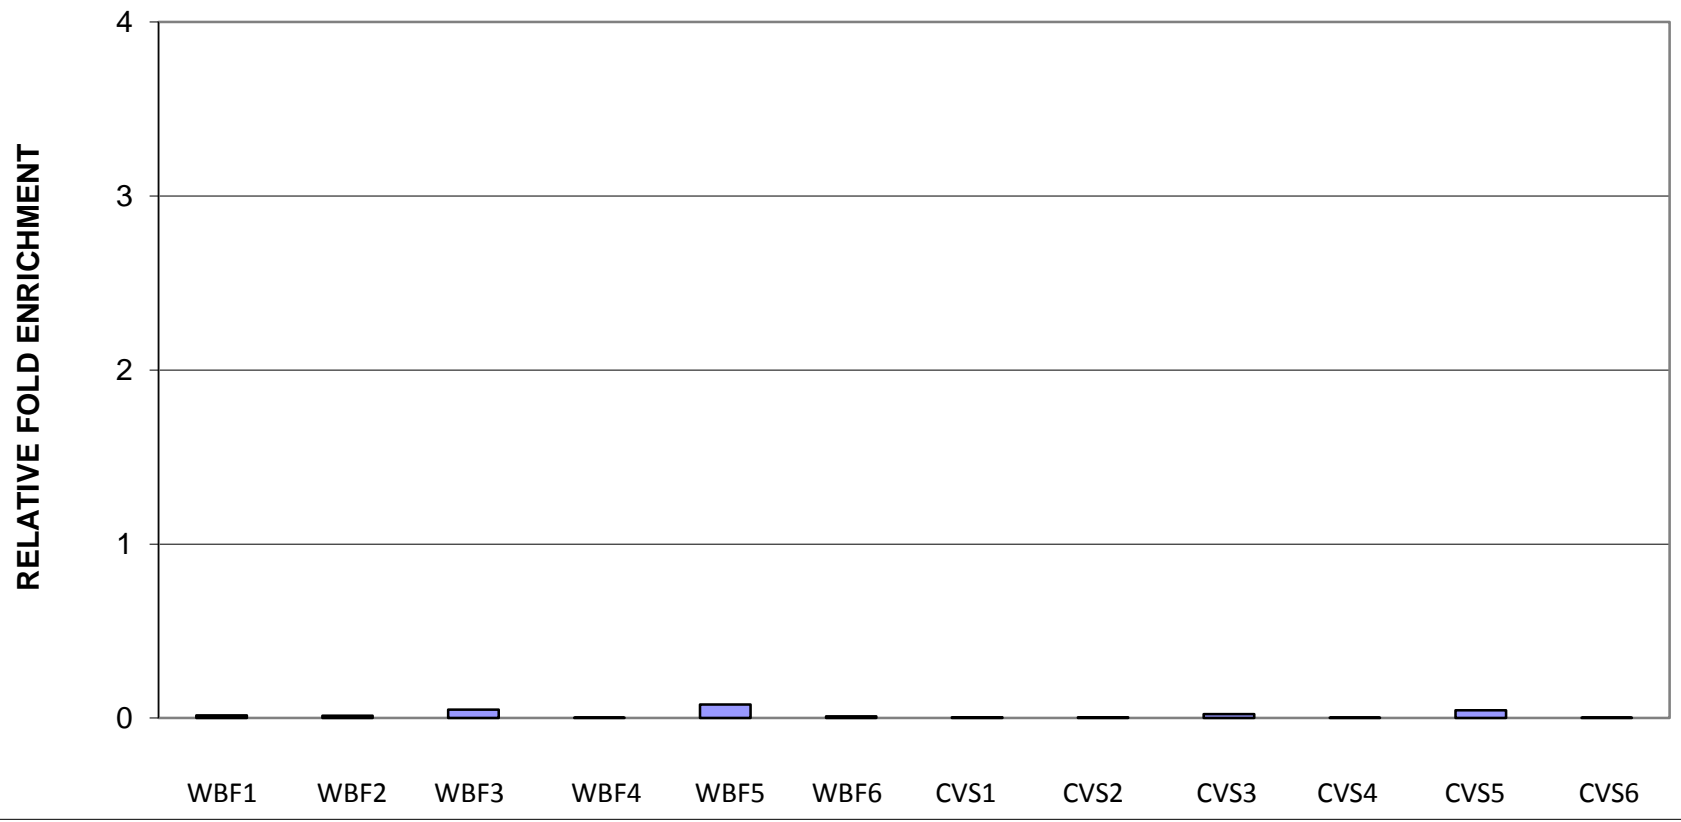

### CHR21(M14A)

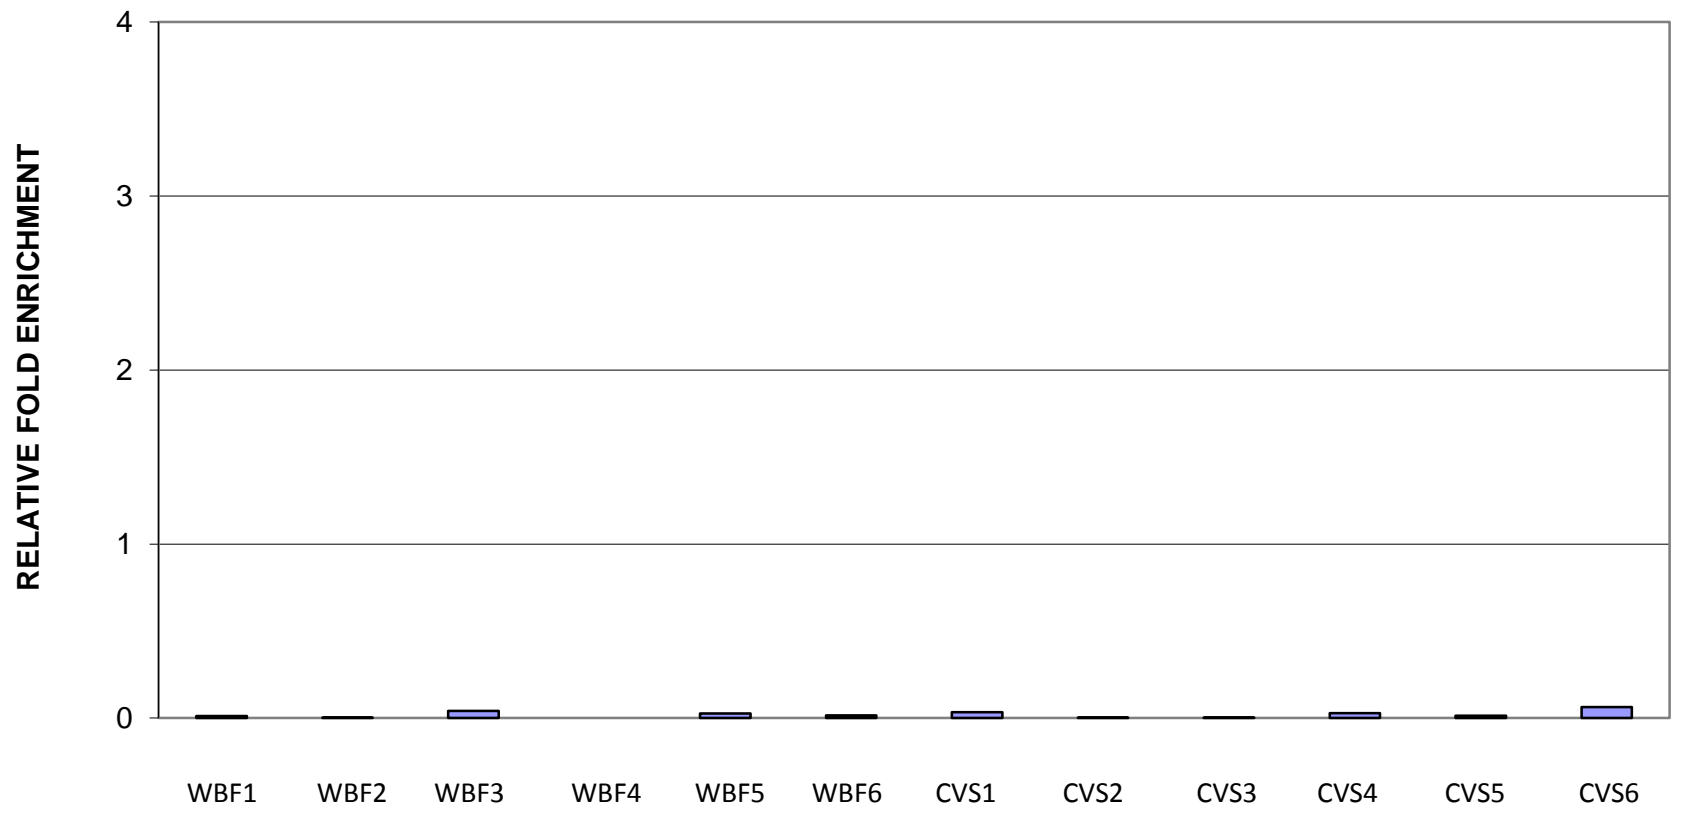

### CHR21(M15)

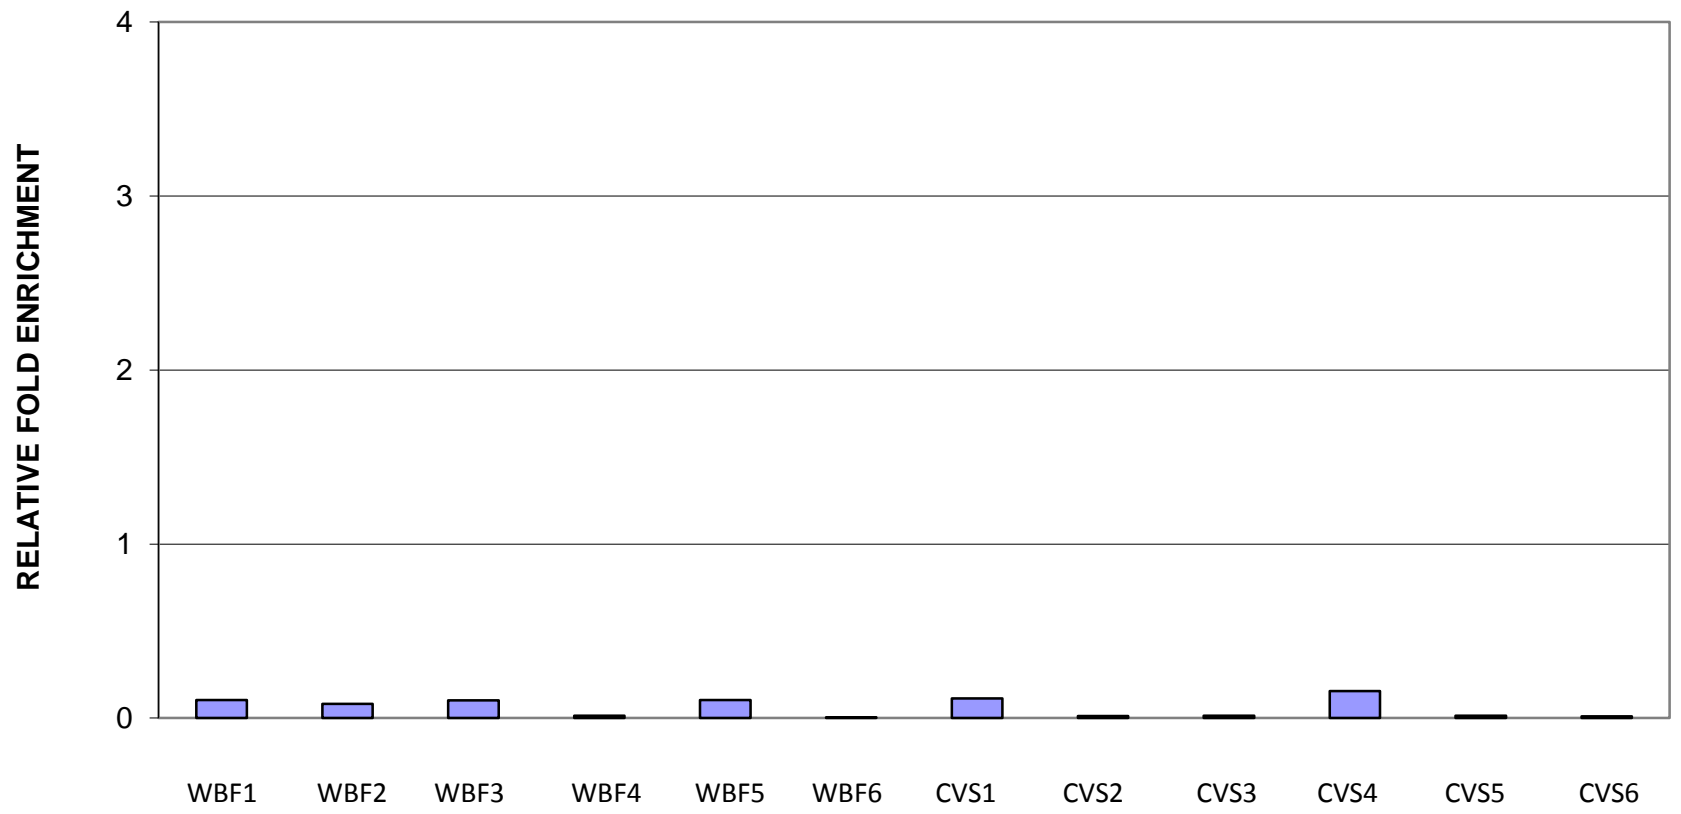



### CHR21(M14B)

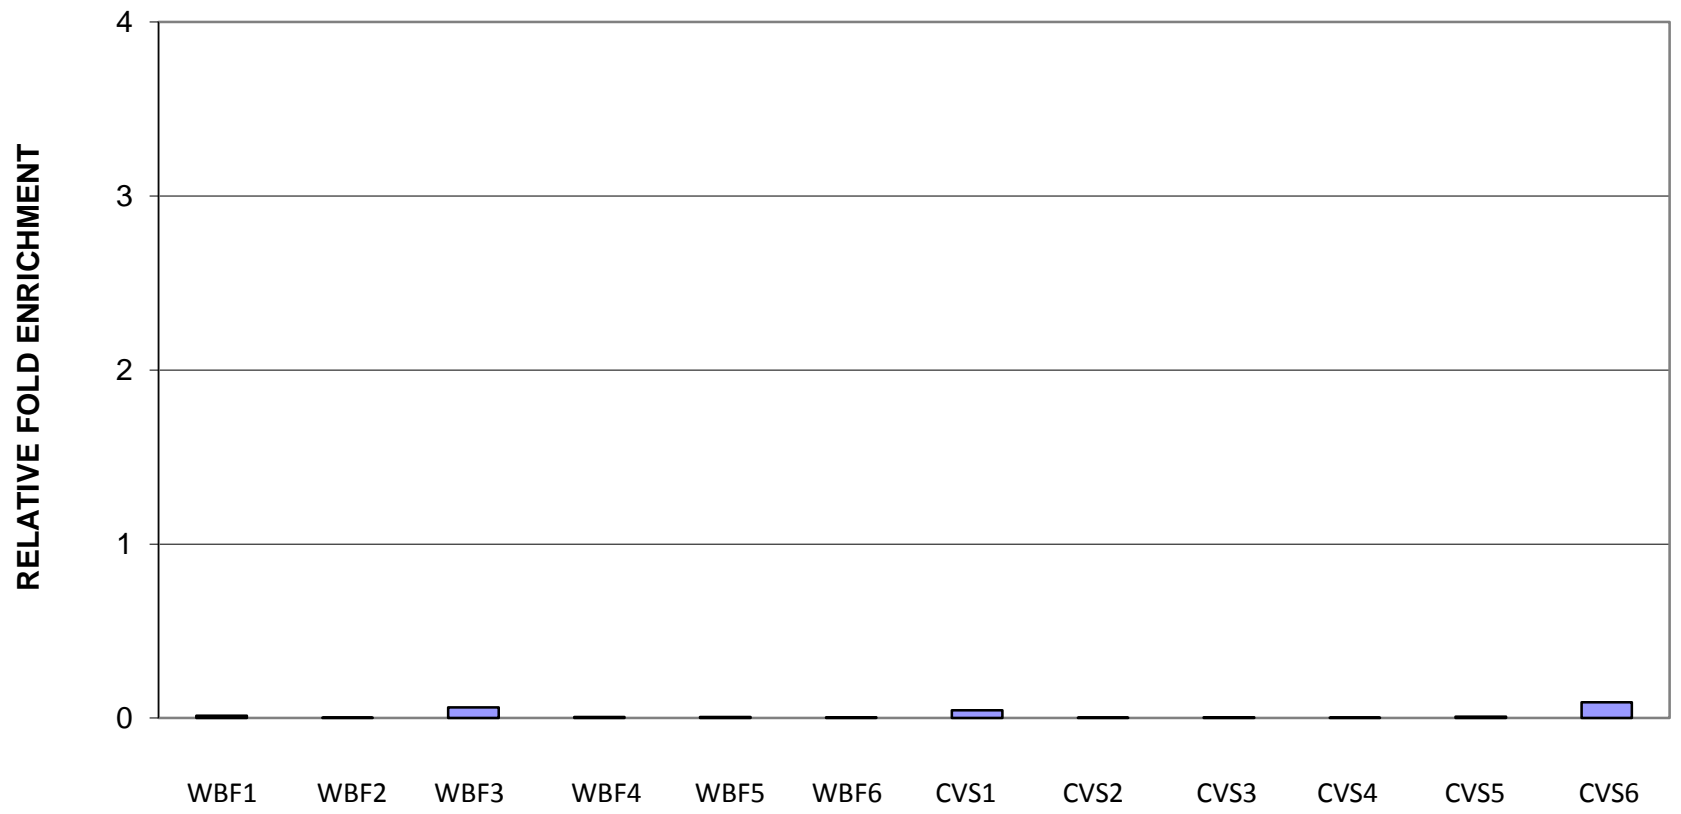

### CHR21(M16A)

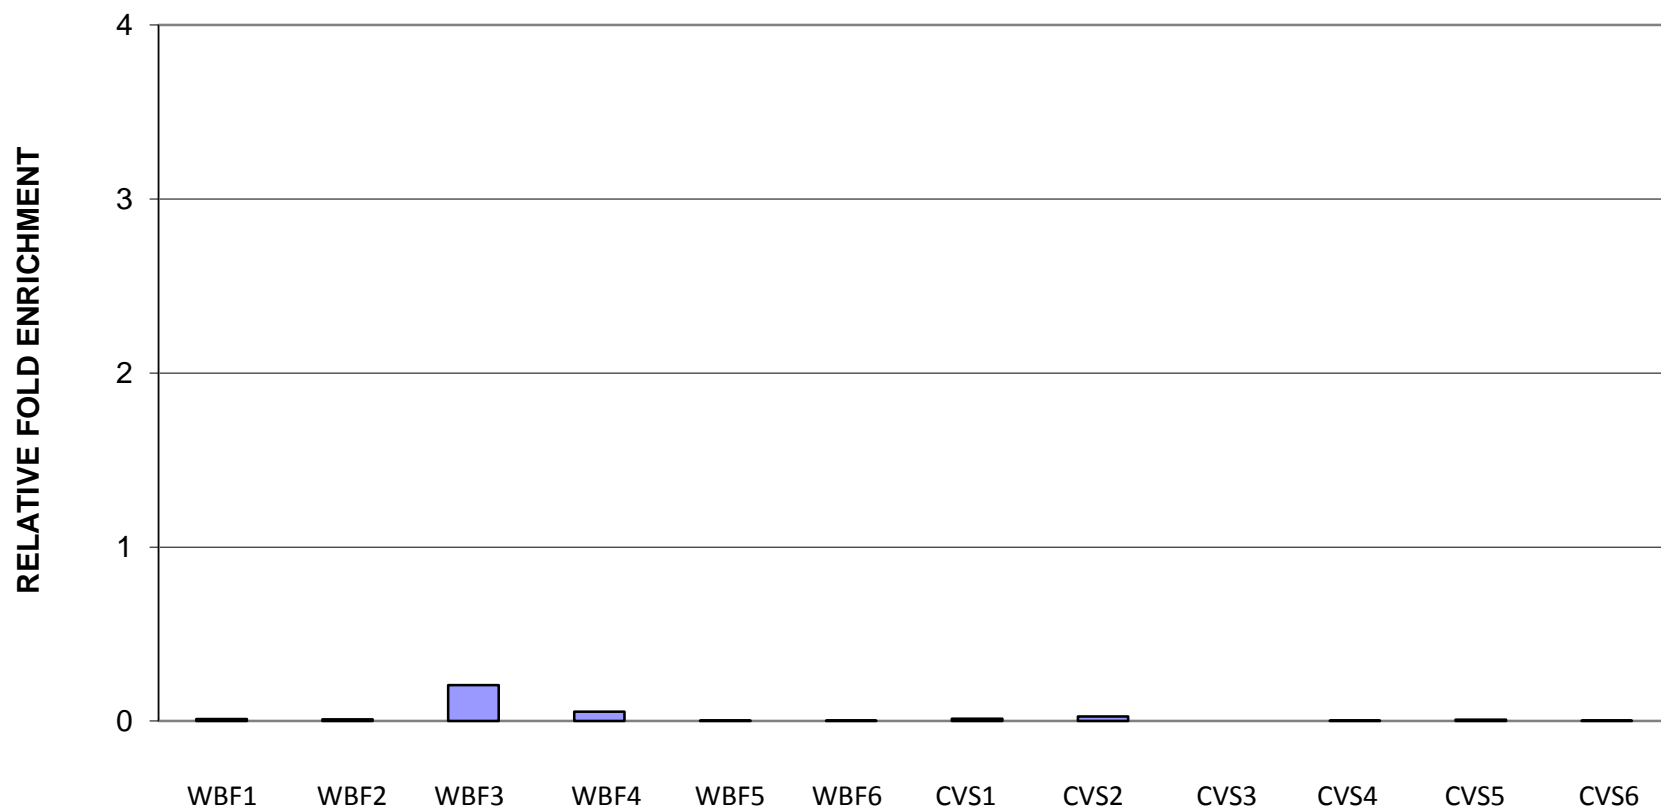

### CHR21(M16B)

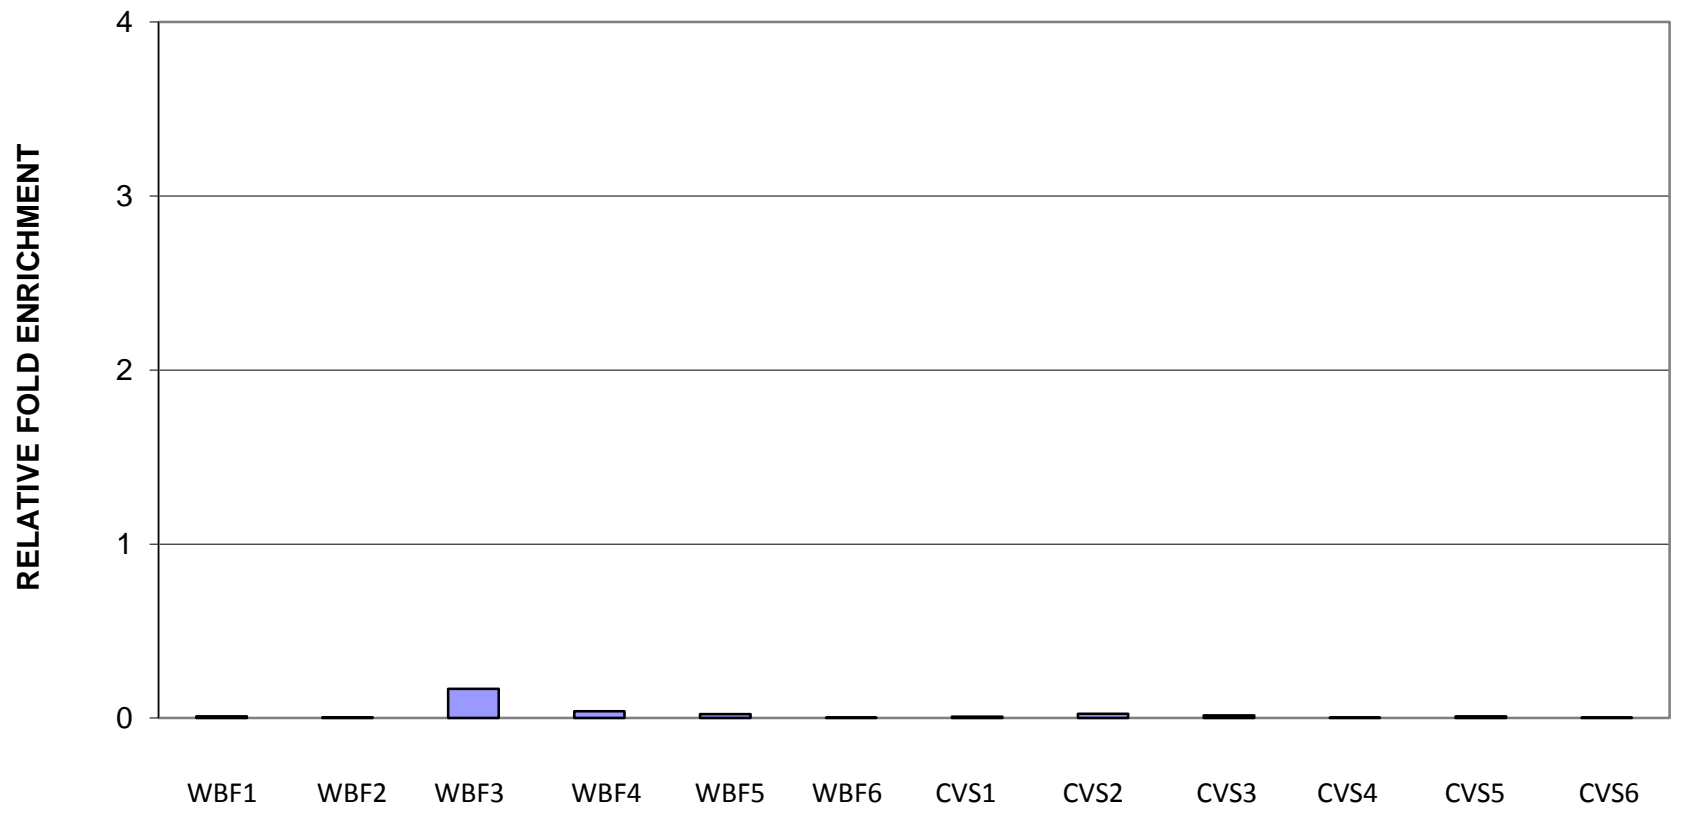

### CHR21(M18)

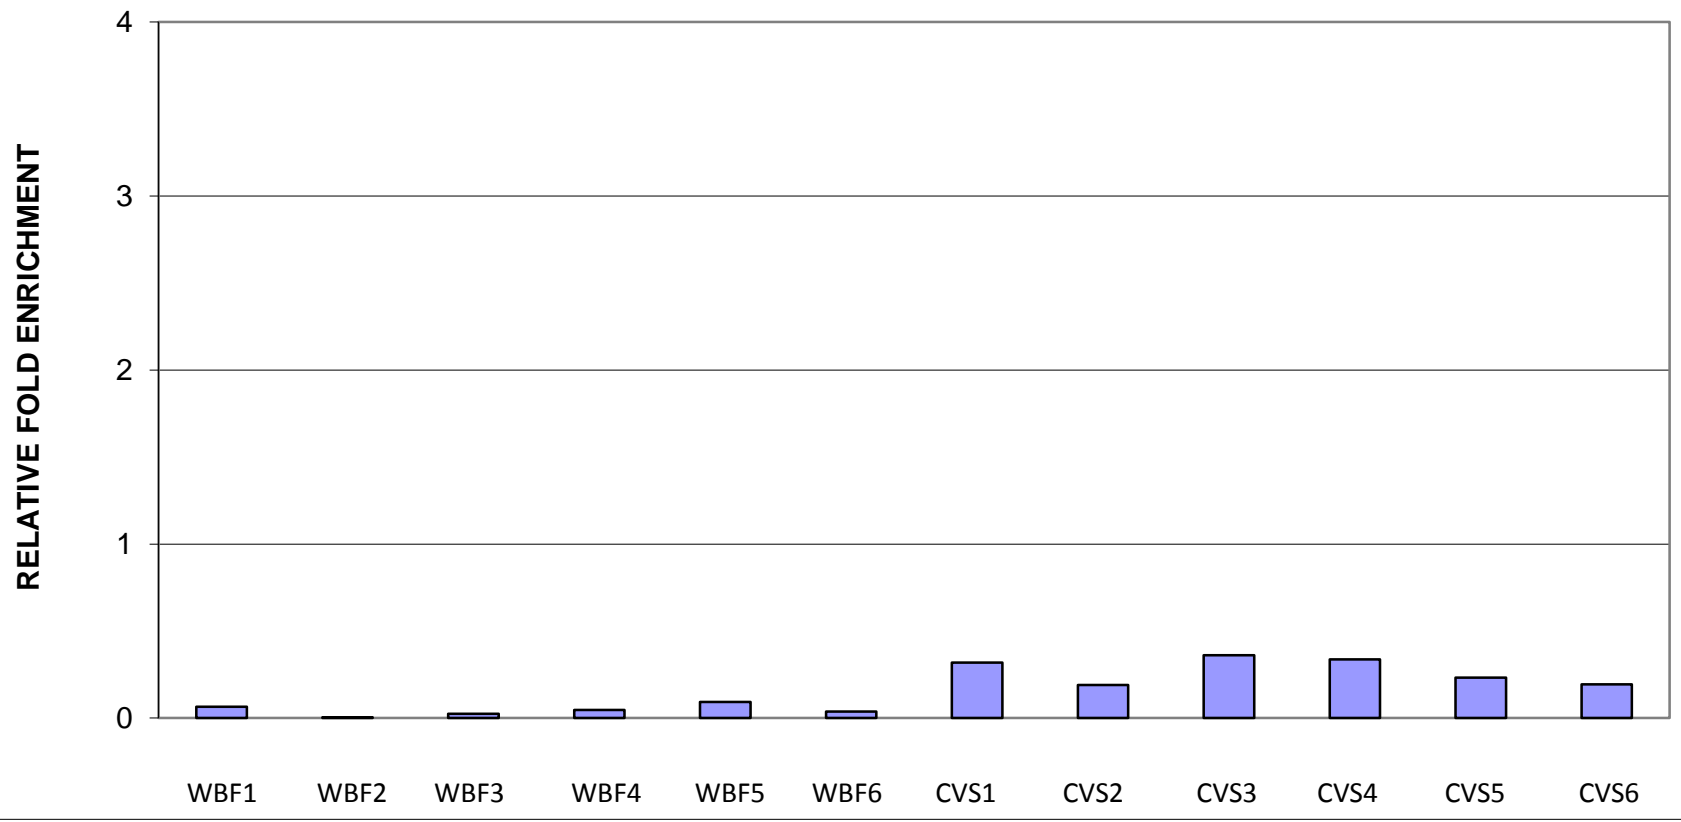

### CHR21(M19)

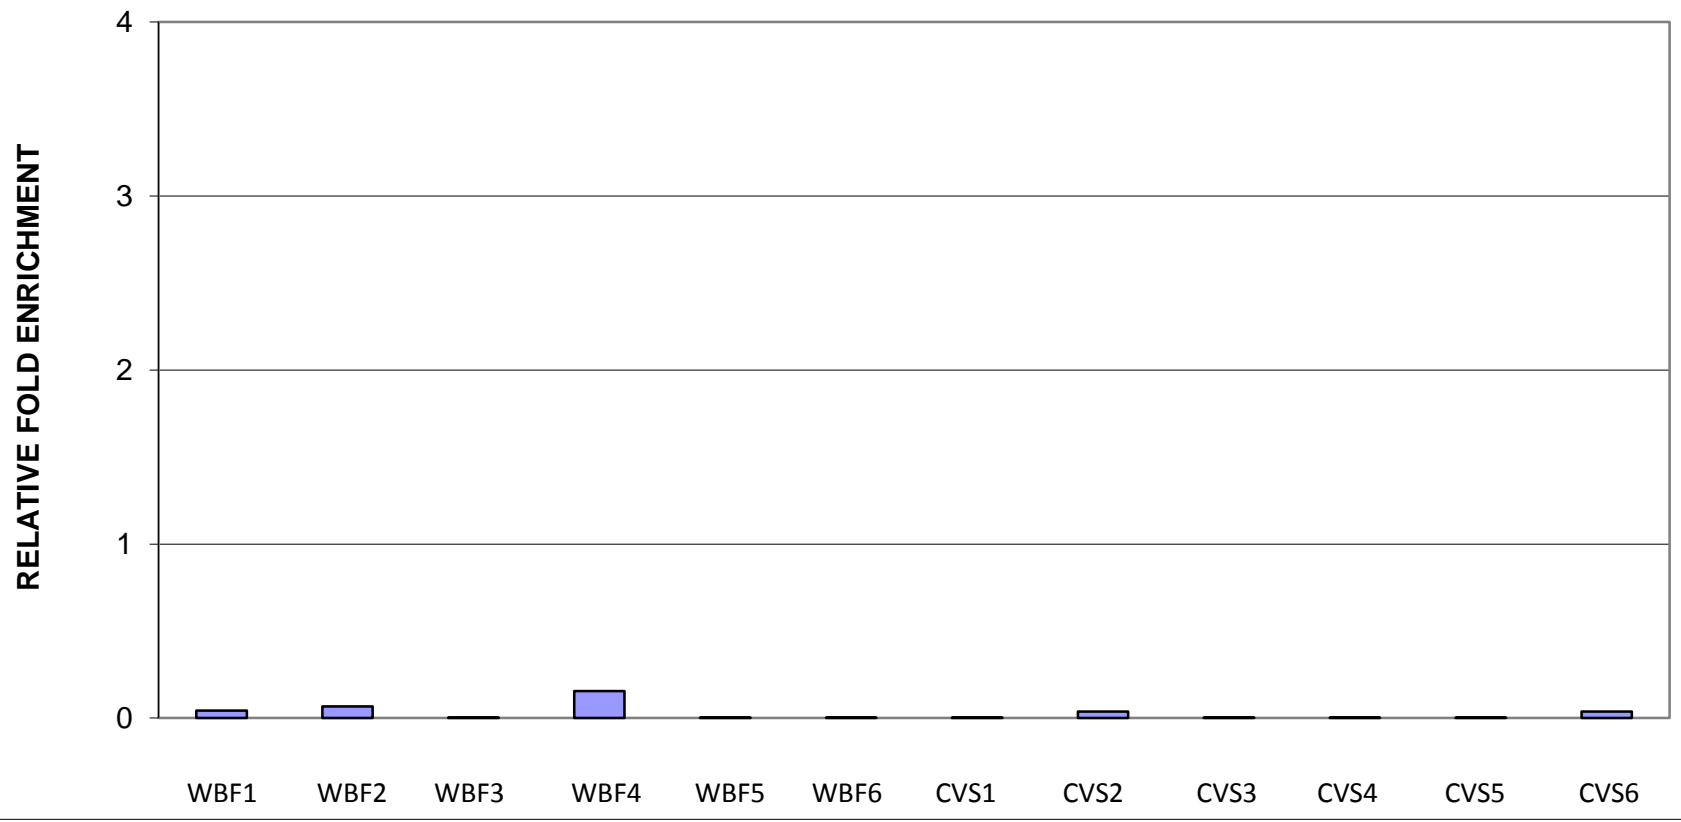

### CHR21(M20)

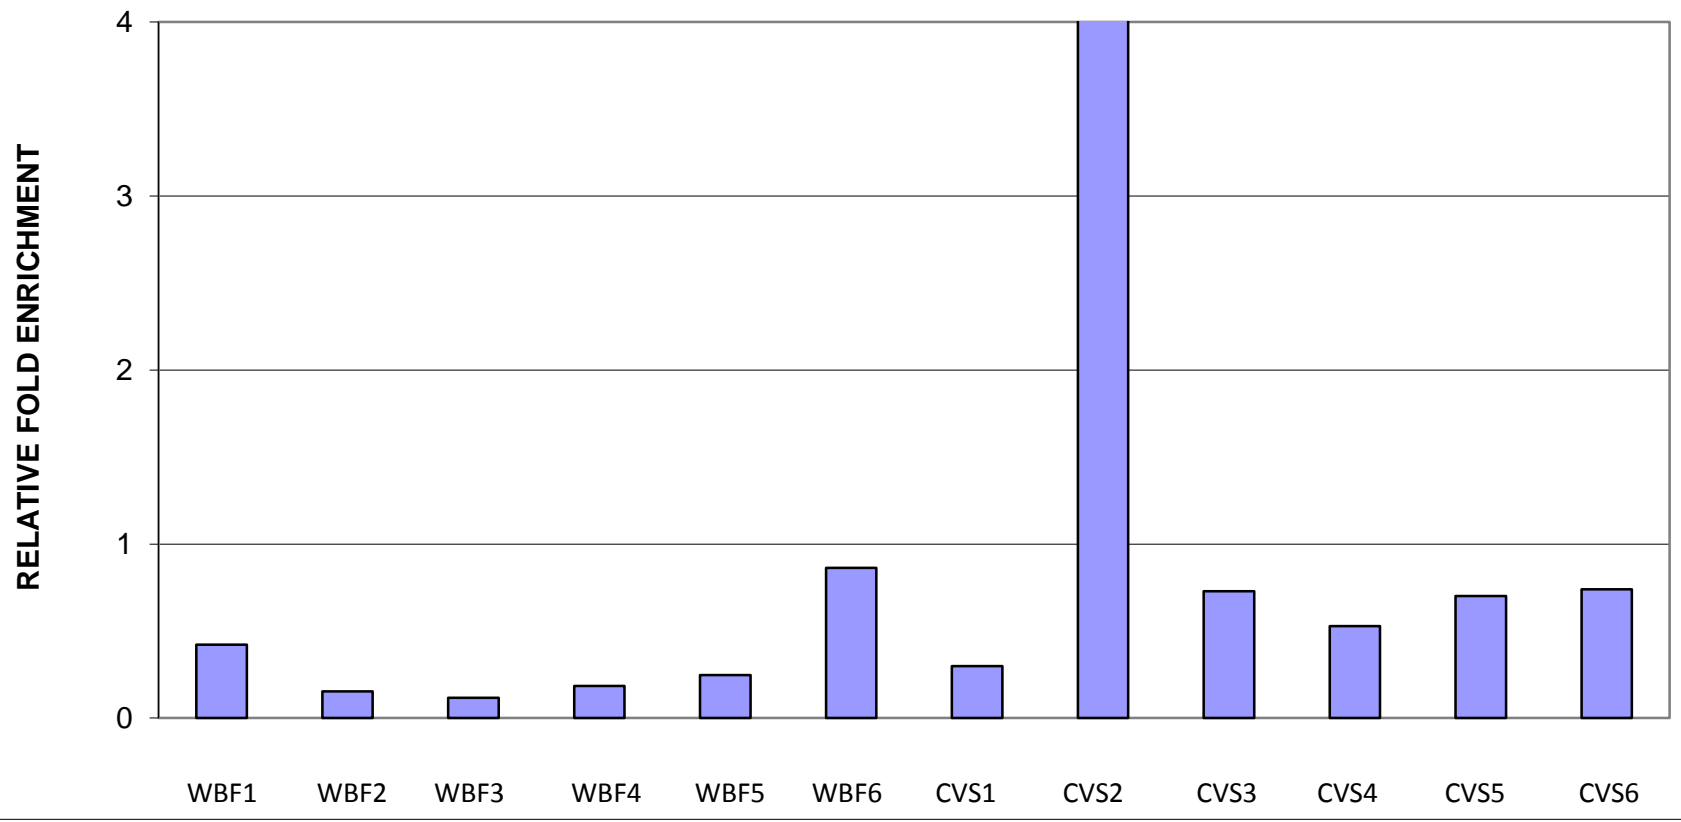

### CHR21(M21)

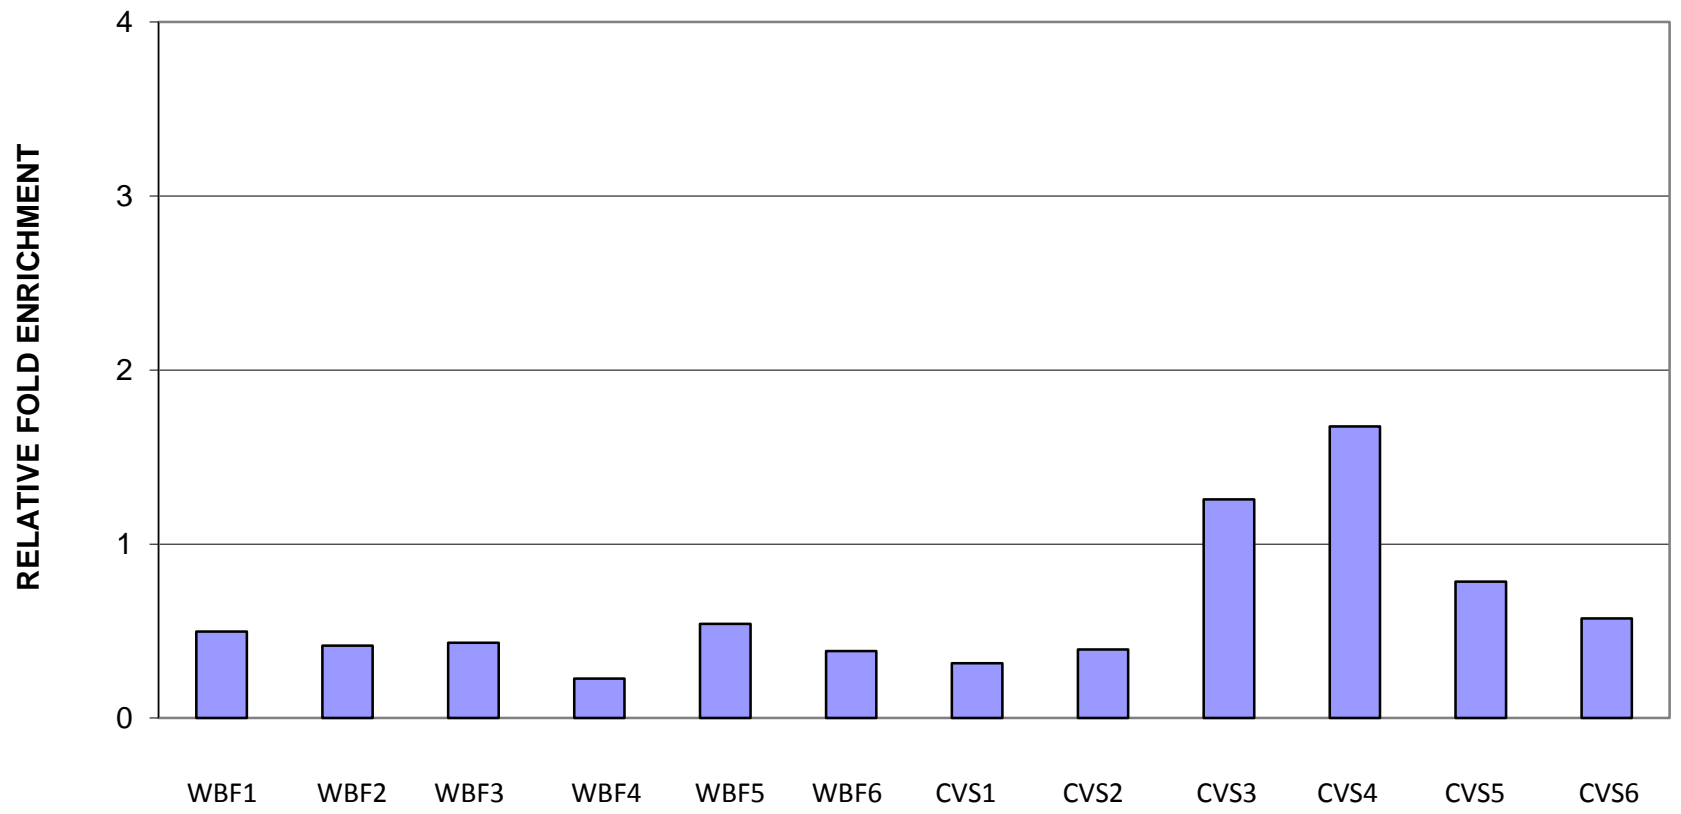

### CHR21(M22)

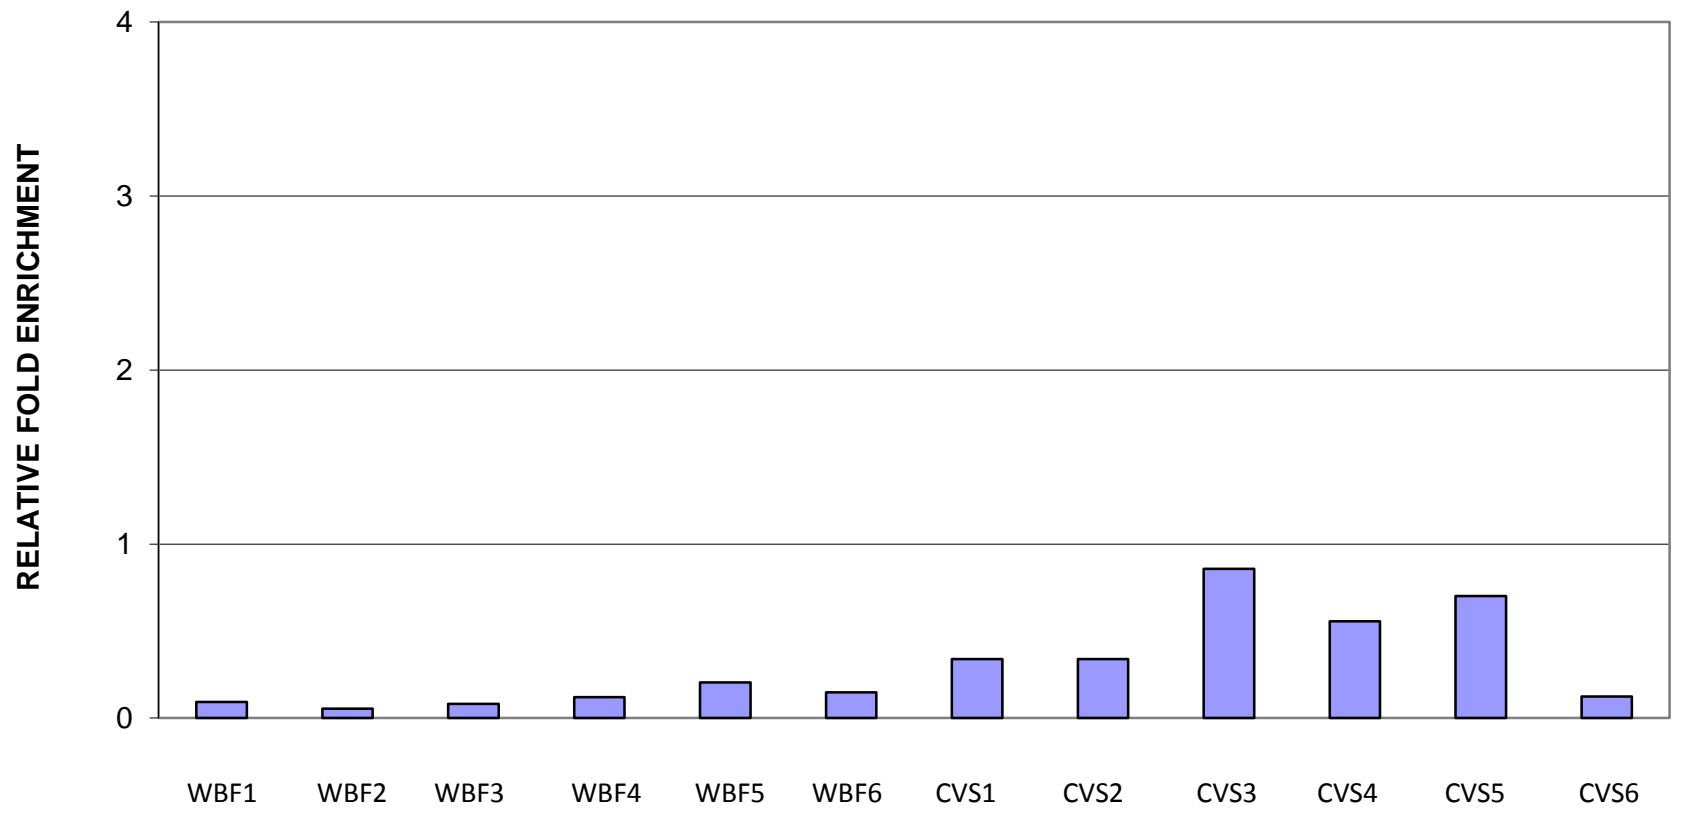



### CHR21(M23)

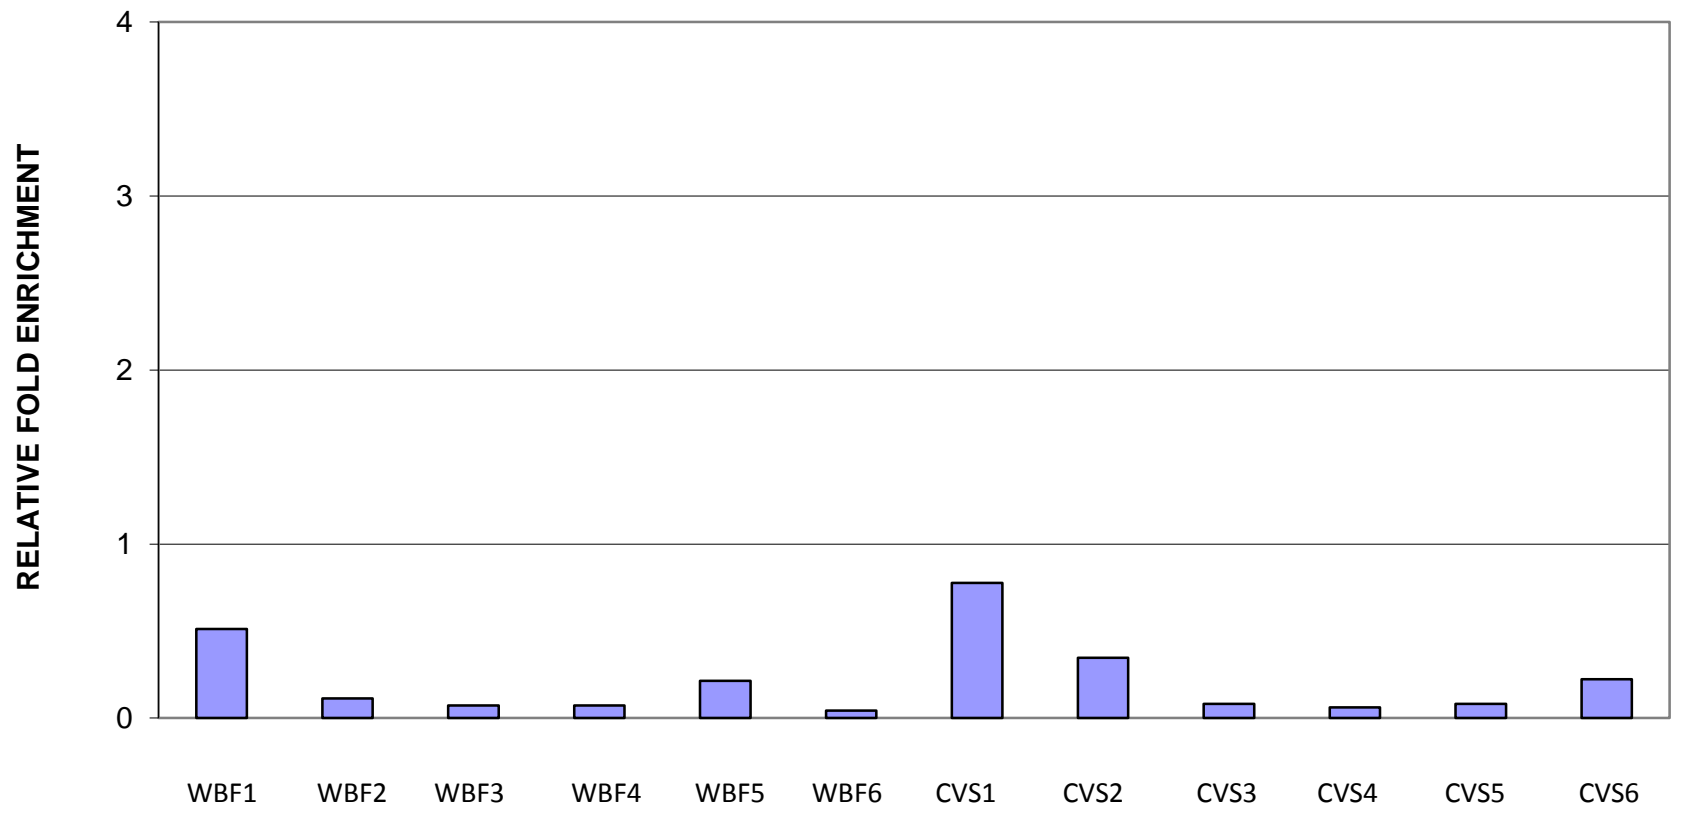

### CHR21(M24)

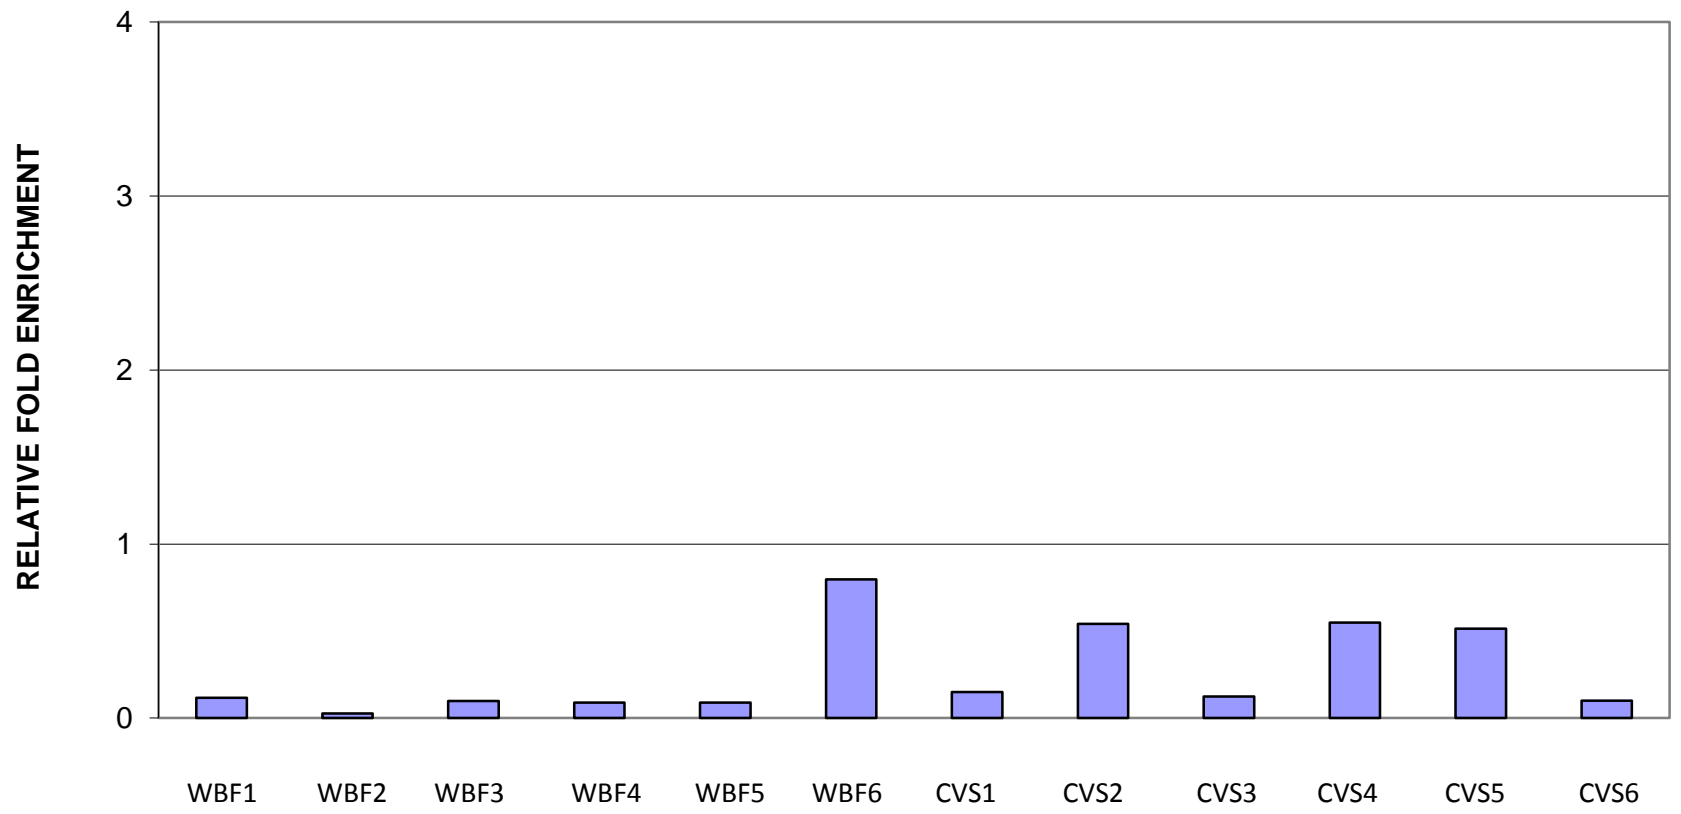

### CHR21(M25)

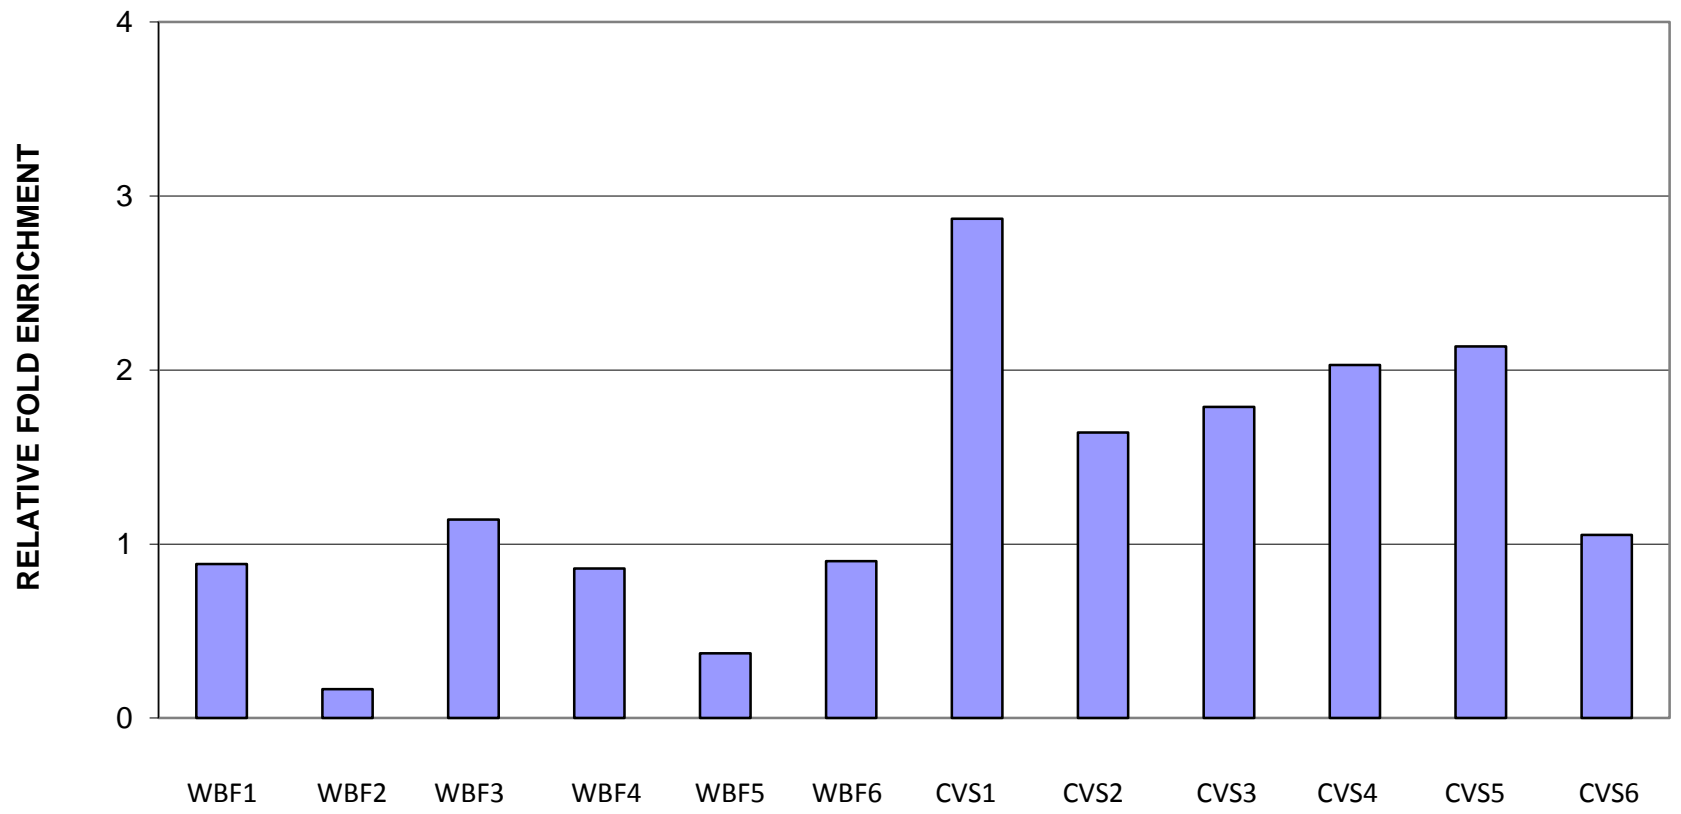

### CHR21(M26)

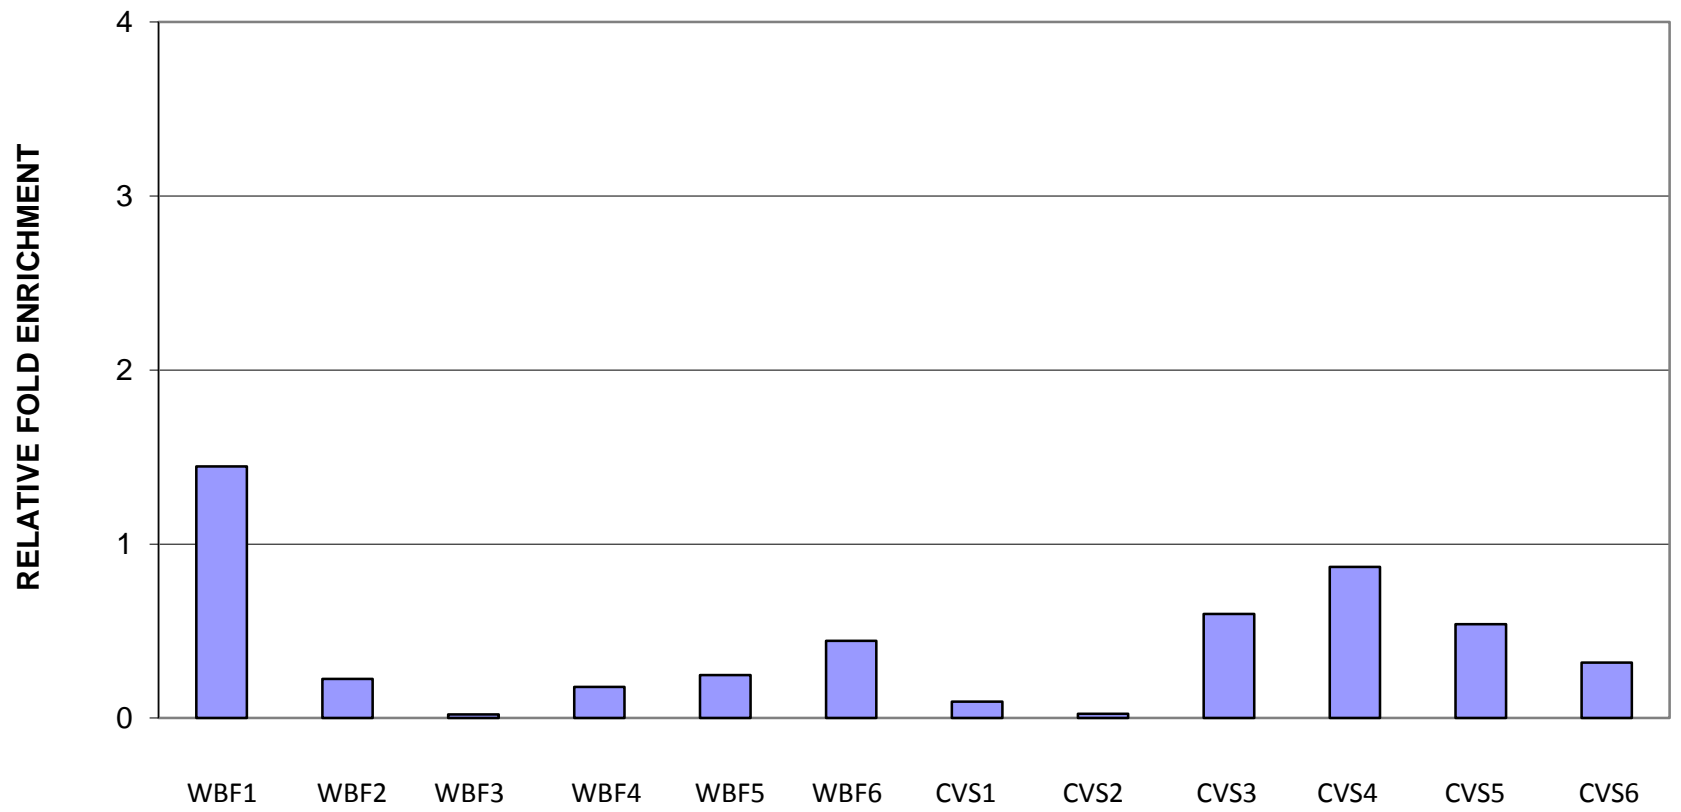

### CHR21(M27)

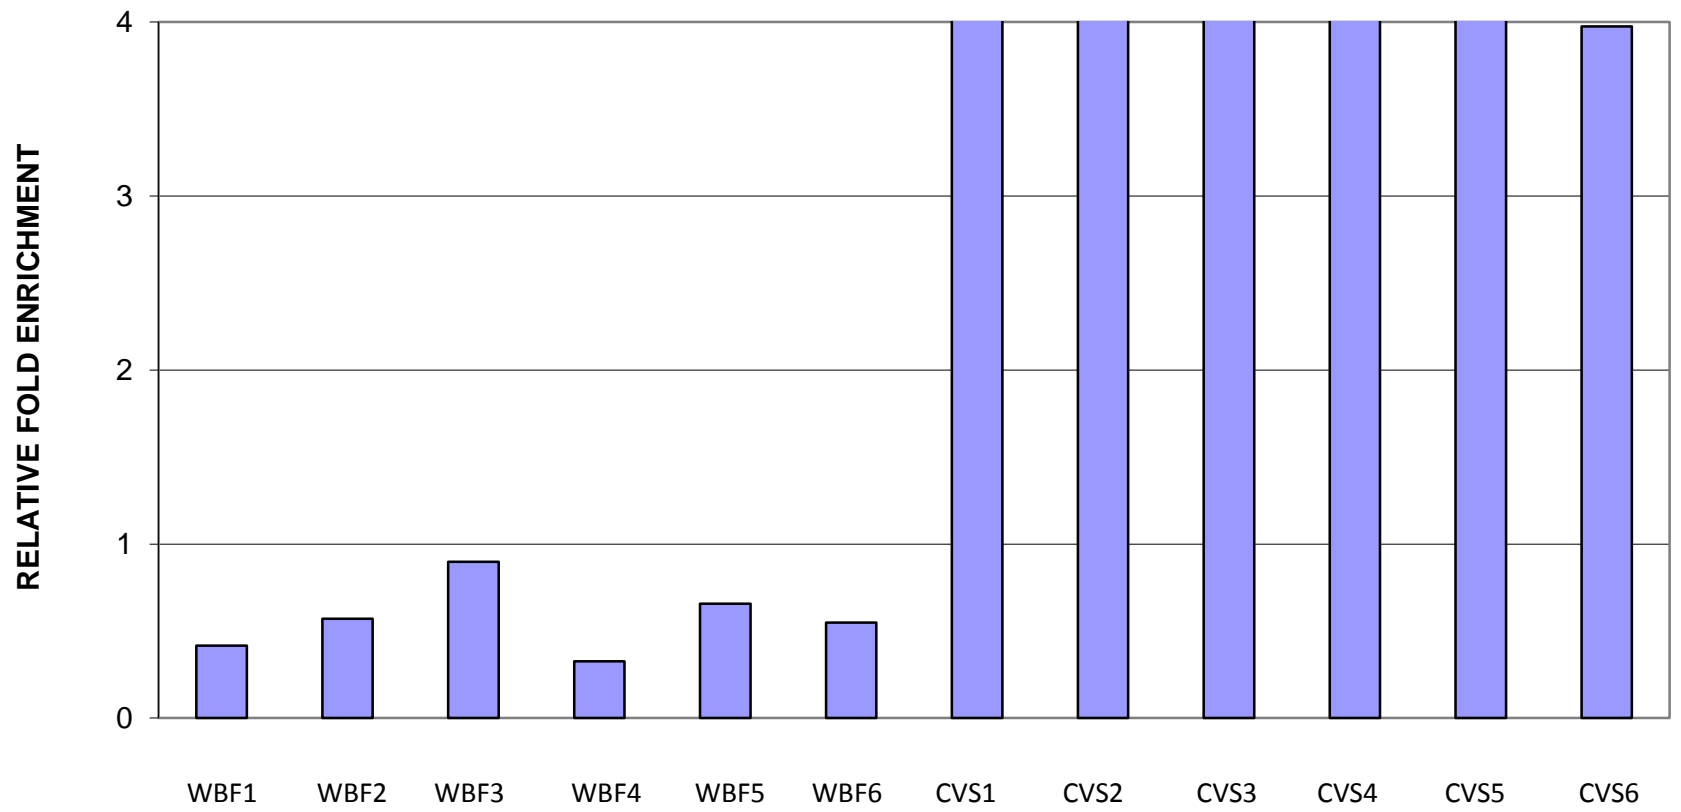

### CHR21(M28)

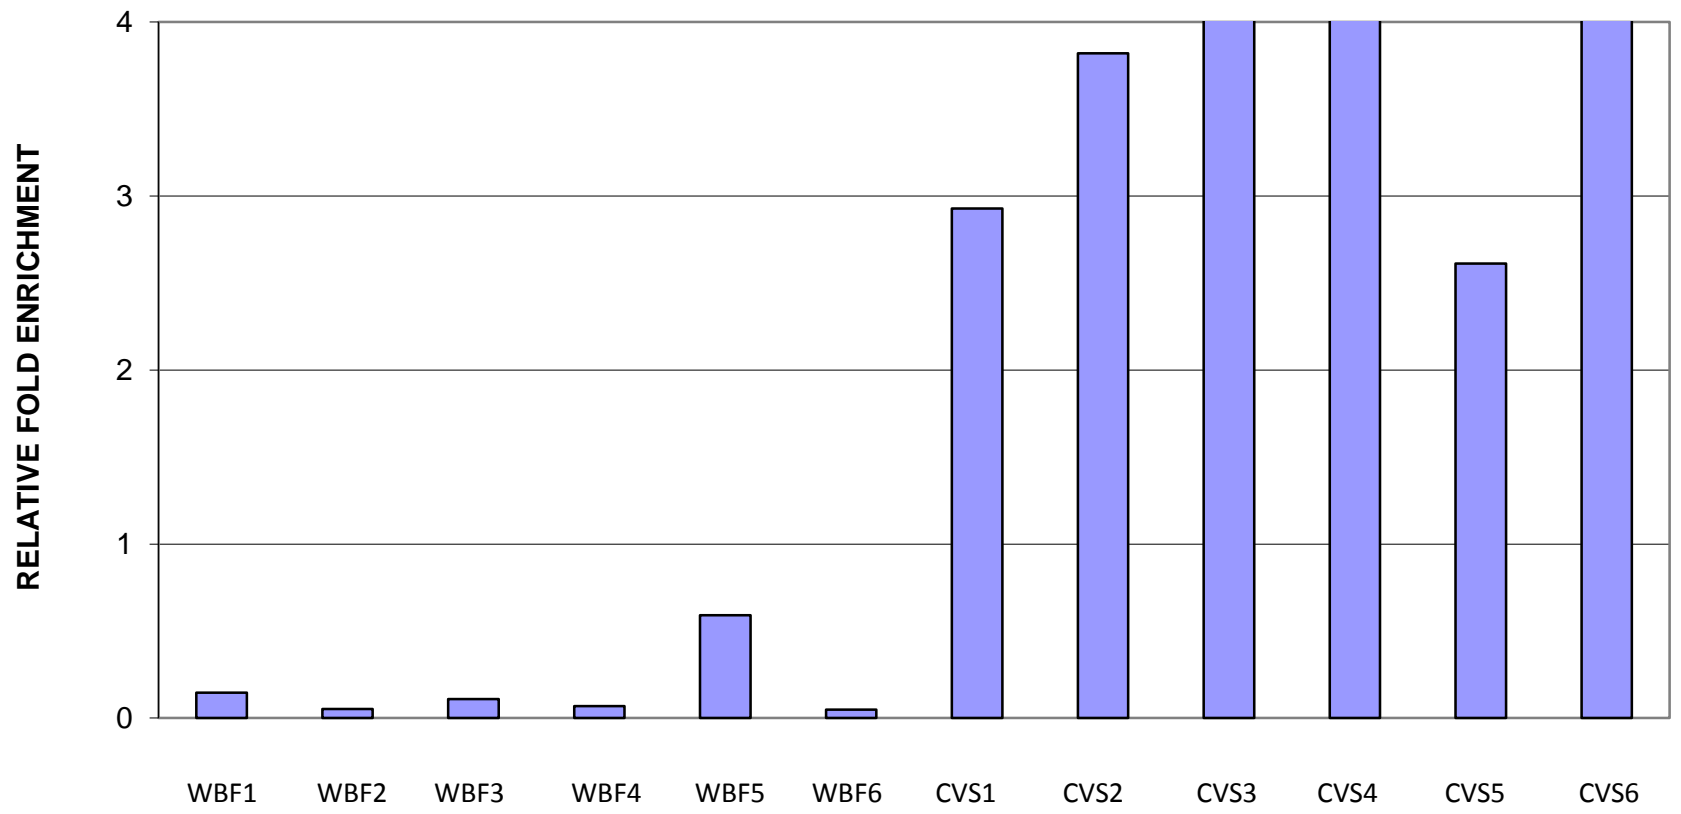

### CHR21(M29)

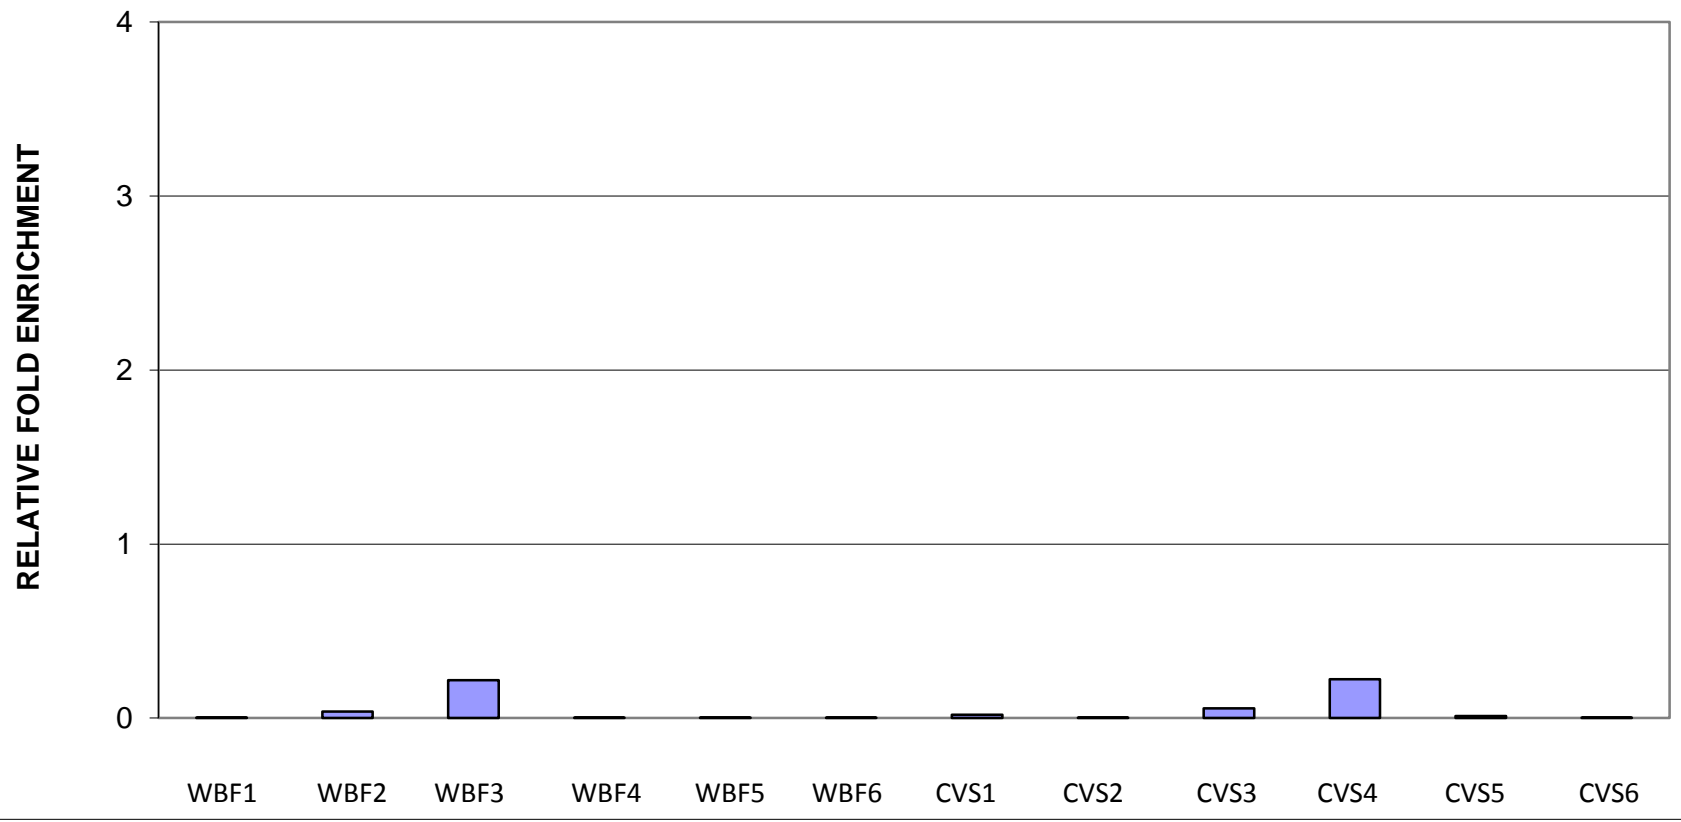

### CHR21(EI-3)

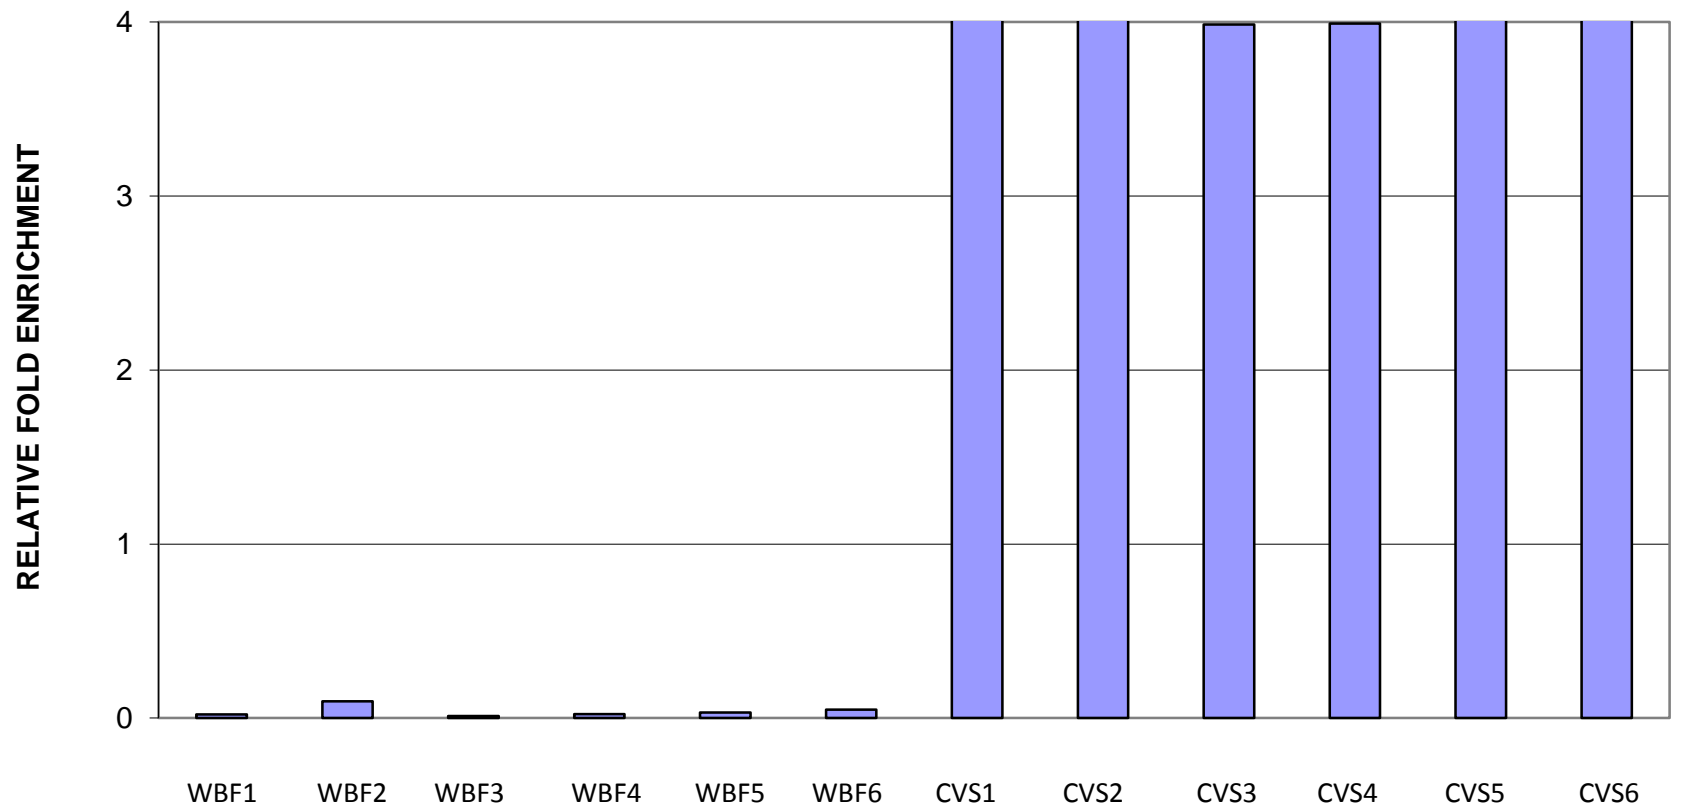



### CHR21(EI-4)

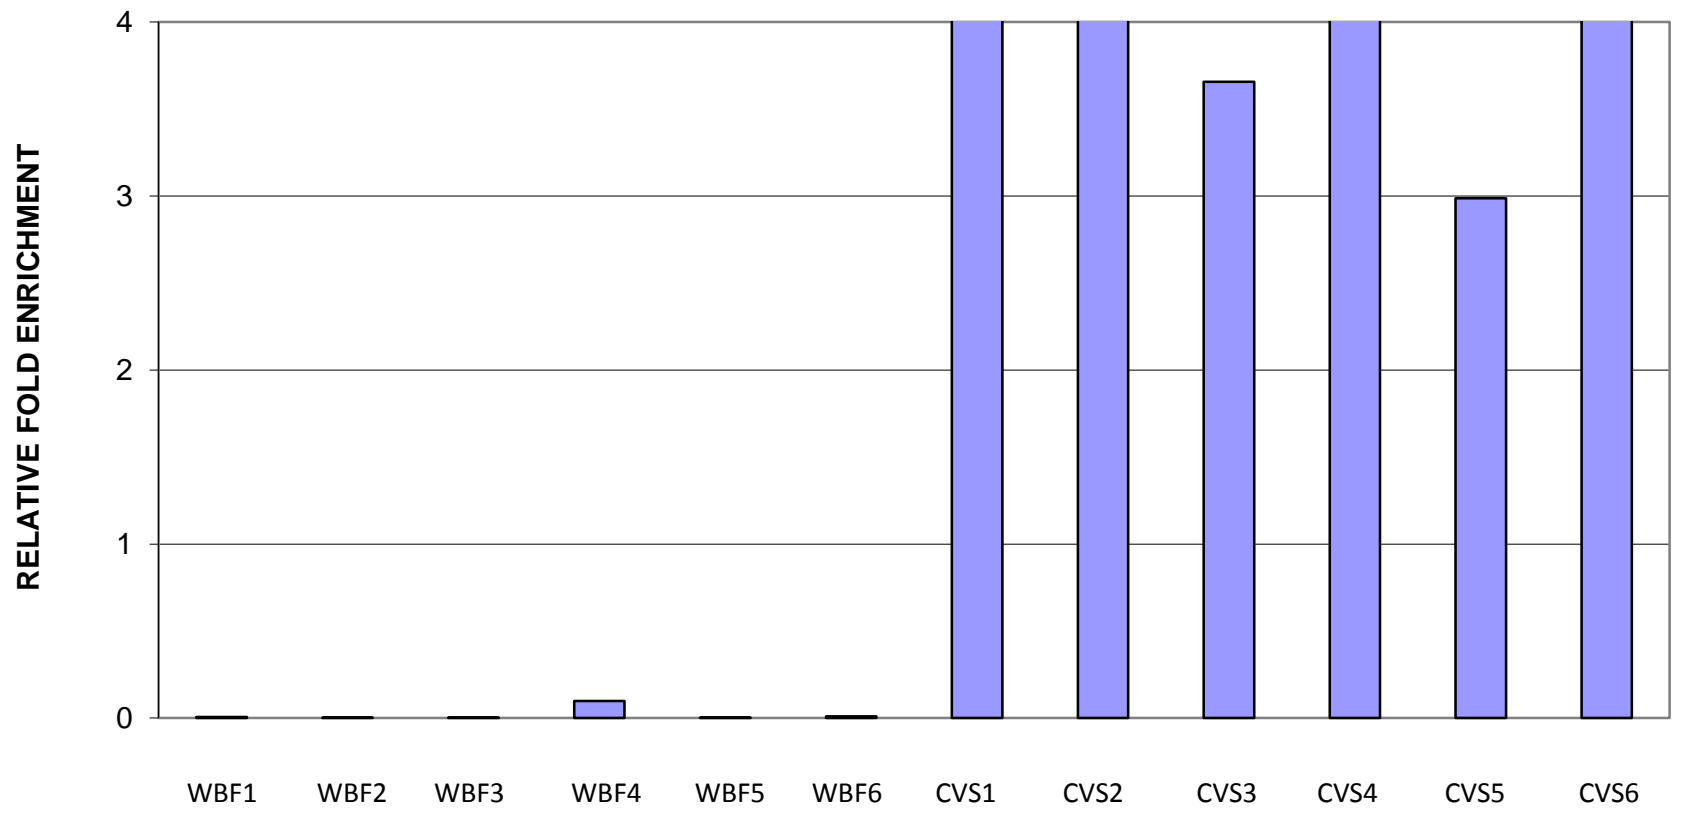

Supplement: 13039_2014_73_MOESM1_ESM.pdf [file 13039_2014_73_MOESM1_ESM.pdf]
